1 **VSGs expressed during natural *T. b. gambiense* infection exhibit extensive sequence**  
2 **divergence and a subspecies-specific expression bias**

3  
4 Jaime So<sup>1\*\*</sup>, Sarah Sudlow<sup>1\*\*</sup>, Abeer Sayeed<sup>1</sup>, Tanner Grudda<sup>1</sup>, Stijn Deborggraeve<sup>2#</sup>,  
5 Dieudonné Mumba Ngoyi<sup>3</sup>, Didier Kashiama Desamber<sup>4</sup>, Bill Wickstead<sup>5</sup>, Veerle Lejon<sup>6</sup>, and  
6 Monica R. Mugnier<sup>1\*</sup>  
7  
8

9 <sup>1</sup>Department of Molecular Microbiology and Immunology, Johns Hopkins Bloomberg School of  
10 Public Health, Baltimore, Maryland, United States of America

11  
12 <sup>2</sup>Department of Biomedical Sciences, Institute of Tropical Medicine, Antwerp, Belgium

13  
14 <sup>3</sup>Department of Parasitology, Institut National de Recherche Biomédicale, Kinshasa, Democratic  
15 Republic of the Congo

16  
17 <sup>4</sup>Programme Nationale de Lutte contre la Trypanosomiase Humaine Africaine, (PNLTHA),  
18 Ministry of Health, Kinshasa, Democratic Republic of the Congo

19  
20 <sup>5</sup> School of Life Sciences, Queen's Medical Centre, University of Nottingham, Nottingham, NG7  
21 2UH, United Kingdom

22  
23 <sup>6</sup> UMR-177 Intertryp, Institut de Recherche pour le Développement, Centre de Coopération  
24 Internationale en Recherche Agronomique pour le Développement, University of Montpellier,  
25 Montpellier, France

26  
27  
28  
29 \*\*These authors contributed equally to the work

30 # Current address: Médecins Sans Frontières - Access Campaign, Geneva, Switzerland

31  
32 \* Corresponding author

33 E-mail: mmugnie1@jhu.edu (MM)

34

35

36 **Abstract**  
37

38 *Trypanosoma brucei gambiense* is the primary causative agent of human African trypanosomiasis (HAT),  
39 a vector-borne disease endemic to West and Central Africa. The extracellular parasite evades antibody  
40 recognition within the host bloodstream by altering its Variant Surface Glycoprotein (VSG) coat through a  
41 process of antigenic variation. The serological tests which are widely used to screen for HAT use VSG as  
42 one of the target antigens. However, the VSGs expressed during human infection have not been  
43 characterized. Here we use VSG-seq to analyze the VSGs expressed in the blood of patients infected with  
44 *T. b. gambiense* and compared them to VSG expression in *T. b. rhodesiense* infections in humans as well  
45 as *T. b. brucei* infections in mice. The 44 VSGs expressed during *T. b. gambiense* infection revealed a  
46 striking bias towards expression of type B N-termini (82% of detected VSGs). This bias is specific to *T. b.*  
47 *gambiense*, which is unique among *T. brucei* subspecies in its chronic clinical presentation and  
48 anthroponotic nature, pointing towards a potential link between VSG expression and pathogenesis. The  
49 expressed *T. b. gambiense* VSGs also share very little similarity to sequences from 36 *T. b. gambiense*  
50 whole genome sequencing datasets, particularly in areas of the VSG protein exposed to host antibodies,  
51 suggesting that wild *T. brucei* VSG repertoires vary more than previously expected. Overall, this work  
52 demonstrates new features of antigenic variation in *T. brucei gambiense* and highlights the importance of  
53 understanding VSG repertoires in nature.

54  
55 **Significance Statement**  
56

57 Human African Trypanosomiasis is a neglected tropical disease primarily caused by the extracellular  
58 parasite *Trypanosoma brucei gambiense*. To avoid elimination by the host, these parasites repeatedly  
59 replace their Variant Surface Glycoprotein (VSG) coat. Despite the important role of VSGs in prolonging  
60 infection, VSG expression during human infections is poorly understood. A better understanding of natural  
61 VSG gene expression dynamics can clarify the mechanisms that *T. brucei* uses to alter its VSG coat and  
62 improve trypanosomiasis diagnosis in humans. We analyzed the expressed VSGs detected in the blood of  
63 patients with trypanosomiasis. Our findings indicate that there are features of antigenic variation unique to  
64 human-infective *T. brucei* subspecies and VSGs expressed in natural infection may vary more than  
65 previously expected.  
66

## 67 Introduction

68

69 Human African Trypanosomiasis (HAT) is caused by the protozoan parasite *Trypanosoma brucei*.  
70 *T. brucei* and its vector, the tsetse fly, are endemic to sub-Saharan Africa (1). There are two  
71 human-infective *T. brucei* subspecies: *T. b. gambiense*, which causes chronic infection in West  
72 and Central Africa (~98% of cases), and *T. b. rhodesiense*, which causes acute infection in East  
73 and Southern Africa (~2% of cases) (2, 3). In humans, infections progress from an early stage,  
74 usually marked by a fever and body aches, to a late stage associated with severe neurological  
75 symptoms that begins when the parasite crosses the blood-brain barrier (4). HAT is considered  
76 fatal without timely diagnosis and treatment. While around 50 million people are at risk of infection  
77 (5), the number of annual human infections has declined significantly in recent years, with only  
78 864 cases reported in 2019 (6). The World Health Organization is working towards zero human  
79 transmissions of HAT caused by *T. b. gambiense* (gHAT) by 2030 (7). Case detection and  
80 treatment is an important component of current public health initiatives to control the disease.

81

82 Prospects for developing a vaccine are severely confounded by the ability of African  
83 trypanosomes to alter their surface antigens (8). As *T. brucei* persists extracellularly in blood,  
84 lymph, and tissue fluids, it is constantly exposed to host antibodies (9–12). The parasite  
85 periodically changes its dense Variant Surface Glycoprotein (VSG) coat to evade immune  
86 recognition. This process, called antigenic variation, relies on a vast collection of thousands of  
87 VSG-encoding genes (13–16). *T. brucei* also continually expands the number of usable antigens  
88 by constructing mosaic VSGs through one or more recombination events between individual VSG  
89 genes (17, 18).

90

91 Although the VSG repertoire is enormous and potentially expanding, these variable proteins are  
92 the primary antigens used for serological screening for gHAT (there is currently no serological  
93 test for diagnosis of infection with *T. b. rhodesiense*). One VSG in particular, LiTat 1.3, has been  
94 identified as an antigen against which many gHAT patients have antibodies (19) and thus serves  
95 as the main target antigen in the primary serological screening tool for gHAT, the card  
96 agglutination test for trypanosomiasis (CATT/*T. b. gambiense*) (20). More recently developed  
97 rapid diagnostic tests use a combination of native LiTat1.3 and another VSG, LiTat1.5 (21, 22),  
98 or the combination of a VSG with the invariant surface glycoprotein ISG 65 (23).

99

100 Despite the widespread use of VSGs as antigens to screen for gHAT, little is known about how  
101 the large genomic repertoire of VSGs is used in natural infections; the number and diversity of  
102 VSGs expressed by wild parasite populations remain unknown. It is unclear whether VSG  
103 repertoires are evolving in the field, potentially affecting the sensitivity of serological tests that use  
104 VSG as an antigen. Notably, some *T. b. gambiense* strains lack the LiTat 1.3 gene entirely (24,  
105 25). A study from our lab that evaluated VSG expression during experimental mouse infections  
106 by VSG-seq, a targeted RNA-sequencing method that identifies the VSGs expressed in a given  
107 population of *T. brucei*, revealed significant VSG diversity within parasite populations in each  
108 animal (26). This diversity suggested that the parasite's genomic VSG repertoire might be  
109 insufficient to sustain a chronic infection, highlighting the potential importance of the  
110 recombination mechanisms that form new VSGs (13, 17).

111

112 Given the role of VSGs during infection and their importance in gHAT screening tests, a better  
113 understanding of VSG expression in nature could inform the development of improved screening  
114 tests while providing insight into the molecular mechanisms of antigenic variation. To our  
115 knowledge, only one study has investigated VSG expression in wild *T. brucei* isolates (27). For  
116 technical reasons, this study relied on RNA isolated from parasites passaged through small  
117 animals after collection from the natural host. As VSG expression may change during passage,

118 the data obtained from these samples are somewhat difficult to interpret. To better understand  
119 the characteristics of antigenic variation in natural *T. brucei* infections, we sought to analyze VSG  
120 expression in *T. brucei* field isolates from which RNA was directly extracted.

121  
122 In the present study, we used VSG-seq to analyze the VSGs expressed by *T. b. gambiense* in  
123 the blood of 12 patients with a confirmed infection. To complement these data, we also used our  
124 pipeline to analyze published RNA-seq datasets from both experimental mouse infections and *T.*  
125 *b. rhodesiense* patients. In addition to VSG-seq, we searched for evidence of sequence homology  
126 in a large set of whole genome sequences for a variety of *T. b. gambiense* isolates. Our analysis  
127 revealed distinct biases in VSG expression that appear to be unique to the *T. b. gambiense*  
128 subspecies and a divergence between expressed patient VSG and previously characterized *T. b.*  
129 *gambiense* strains that suggests patient VSG repertoires are more diverse than previously  
130 expected.

131 **Results**

132

133 **Parasites in gHAT patients express diverse sets of VSGs**

134

135 To investigate VSG expression in natural human infections, we performed VSG-seq on RNA  
136 extracted from whole blood collected from 12 human African trypanosomiasis patients from five  
137 locations in the Kwilu province of the Democratic Republic of the Congo (DRC) (Figure 1A). We  
138 estimated the relative parasitemia of each patient by SL-QPCR (28), and we estimated the  
139 number of parasites after mAECT on buffy coat for all patients except patient 29 (Table 1). Using  
140 RNA extracted from 2.5 mL of whole blood from each patient, we amplified *T. brucei* RNA from  
141 host/parasite total RNA using a primer against the *T. brucei* spliced leader sequence and an  
142 anchored oligo-dT primer. The resulting trypanosome-enriched cDNA was used as a template to  
143 amplify VSG cDNA in three replicate reactions, and VSG amplicons were then submitted to VSG-  
144 seq sequencing and analysis. To determine whether a VSG was expressed within a patient, we  
145 applied the following stringent cutoffs:

146

- 147 1) We conservatively estimate that each 2.5 mL patient blood sample contained a  
148 minimum of 100 parasites. At this minimum parasitemia, a single parasite would  
149 represent 1% of the population (and consequently ~1% of the parasite RNA in a  
150 sample). As a result, we excluded all VSGs comprising <1% of the total VSG-seq pool  
151 in each patient as unlikely to represent the major expressed VSG in at least one cell  
152 from the population.
- 153 2) We classified VSGs as expressed if they met the expression cutoff in at least two of  
154 three technical library replicates.

155

156 1112 unique VSG open reading frames were assembled *de novo* from the patient reads and 44  
157 met our expression criteria. Only these 44 VSGs, which we will refer to as “expressed VSGs,”  
158 were considered in downstream analysis, except when otherwise noted. TgsGP, the VSG-like  
159 protein which partially enables resistance to human serum in *T. b. gambiense* (29), assembled in  
160 samples from patients 2, 11, 13, and 17, and met the expression threshold in patients 2, 11, and  
161 17. The absence of this transcript in most samples is likely due to the low amount of input material  
162 used to prepare samples.

163

164 At least one VSG met our expression criteria in each patient, and in most cases, multiple VSGs  
165 were detected. Patient 2 showed the highest diversity, with 14 VSGs expressed (Figure 1B,  
166 Supplemental Figure 1). There is a positive correlation between parasitemia, as estimated by  
167 qPCR, and the number of detected VSGs (Supplemental Figure 2), suggesting that Our blood  
168 volumes may not be sampling the full diversity of circulating expressed VSG at low parasitemia.  
169 Nevertheless, two VSGs were shared between patients: VSG ‘Gambiense 195’ was expressed in  
170 both patient 12 and patient 17 from Village C; VSG ‘Gambiense 38’ was expressed in patient 12  
171 from Village C and patient 23 from Village D (Figure 1C). Because our sampling did not reach  
172 saturation, resulting in some variability between technical replicates, we focused only on the  
173 presence/absence of individual VSGs for further analysis, rather than relative expression levels  
174 within each population.

175

176

| Patient | Location  | est. parasites in 500 $\mu$ L buffy coat | mean SL-RNA Ct | WBC | Parasites in CSF | Stage      |
|---------|-----------|------------------------------------------|----------------|-----|------------------|------------|
| 1       | Village A | >50                                      | 22.155         | 1   | -                | First      |
| 2       | Village A | >50                                      | 19.020         | 6   | -                | Early 2nd  |
| 3       | Village A | 2-5                                      | 28.780         | 6   | -                | Early 2nd  |
| 11      | Village C | >50                                      | 22.030         | 9   | -                | Early 2nd  |
| 12      | Village C | 6-20                                     | 25.430         | 6   | -                | Early 2nd  |
| 13      | Village C | 6-20                                     | 26.635         | 12  | -                | Early 2nd  |
| 17      | Village C | 21-50                                    | 24.495         | 13  | -                | Early 2nd  |
| 19      | Village C | 1                                        | 28.245         | 7   | -                | Early 2nd  |
| 23      | Village D | 6-20                                     | 27.085         | 2   | -                | First      |
| 29      | Village B | -                                        | 28.320         | 3   | -                | First      |
| 30      | Village B | >50                                      | 22.960         | 694 | +                | Severe 2nd |
| 33      | Village E | 1                                        | 32.385         | 2   | -                | First      |

177  
178

179

180

181

182

183

184

**Table 1. Patient stage and parasitemia data.** We used the following staging definitions: First: 0-5 WBC/ $\mu$ L, no trypanosomes in cerebrospinal fluid (CSF). Second: >5 WBC/ $\mu$ L or trypanosomes in CSF (with early 2<sup>nd</sup>: 6-20 WBC/ $\mu$ L and no trypanosomes in CSF; severe 2<sup>nd</sup>: >100 WBC/ $\mu$ L). WBC: white blood cells.

185

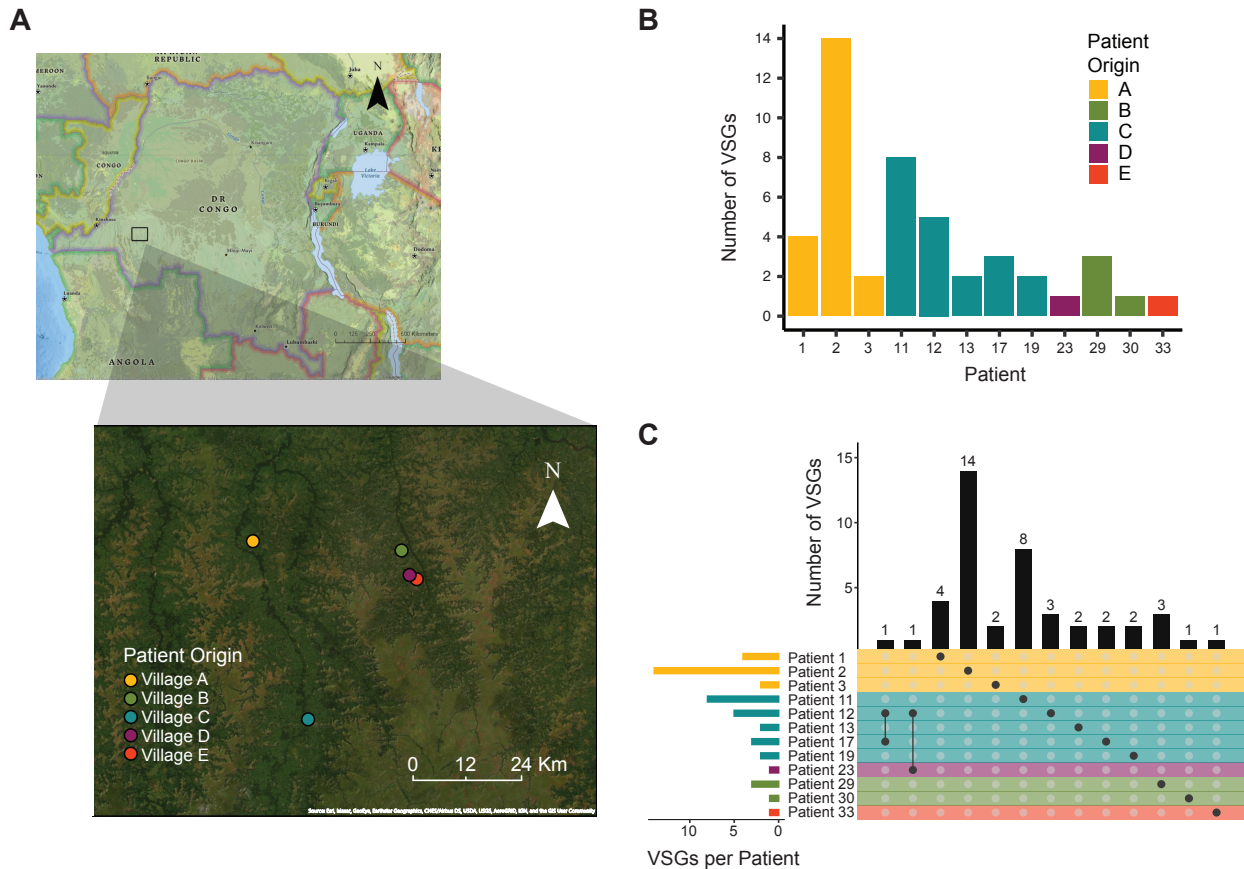

186

187 **Figure 1. Parasites isolated from gHAT patients express multiple VSGs.** (A) Map showing  
 188 the location of each patient's home village. Maps were generated with ArcGIS® software by Esri,  
 189 using world imagery and National Geographic style basemaps. (B) Graph depicting the total  
 190 number of VSGs expressed in each patient. (C) The intersection of expressed VSG sets in each  
 191 patient. Bars on the left represent the size of the total set of VSGs expressed in each patient.  
 192 Dots represent an intersection of sets with bars above the dots representing the size of the  
 193 intersection. Color indicates patient origin.

194

## 195 **Natural *T. b. gambiense* infections show a strong bias towards the expression of type B** 196 **VSG**

197  
198 To further characterize the set of expressed VSGs in these samples, we sought to define the VSG  
199 domain types encoded by each VSG. *T. brucei* VSG contains two domains: a variable N-terminal  
200 domain of ~350-400 amino acids, and a less variable C-terminal domain of ~40-80 amino acids,  
201 characterized by one or two conserved groups of four disulfide-bonded cysteines (13, 30). On the  
202 surface of trypanosomes, the VSG N-terminal domain is readily exposed to the host. In contrast,  
203 the C-terminal domain is proximal to the plasma membrane and largely hidden from host  
204 antibodies (31–33). The N-terminal domain is classified into two types, A and B, each further  
205 distinguished into subtypes (A1-3 and B1-2), while the C-terminal domain has been classified into  
206 six types (1-6) (13, 30). These classifications are based on protein sequence patterns anchored  
207 by the conservation of cysteine residues, but the biological implications of VSG domain types  
208 have not been investigated.

209  
210 We evaluated two automated approaches for determining the type and subtype of each VSG's  
211 N-terminal domain. The first approach was to create a bioinformatic pipeline to determine each  
212 N-terminal domain subtype, using HMM profiles we created for each subtype from sets of N-  
213 terminal domains previously typed by Cross et al. (15). The second approach was to create a  
214 BLASTp network graph based on a published method (34) where the N-terminal subtype of a  
215 VSG is determined by the set of VSGs it clusters with, and clusters are identified using the leading  
216 eigenvector method (35). We used each approach to determine the N-terminal subtype of each  
217 expressed VSG in our patient sample dataset, along with 863 VSG N-termini from the Lister 427  
218 genome. We compared these results to either existing N-terminal classification (for Lister 427  
219 VSGs) or classification based on position in a newly-generated BLASTp-tree (15) (for *T. b.*  
220 *gambiense* VSGs; Figure 2A).

221  
222 Both the new HMM profile and BLASTp network graph approaches generally recapitulated  
223 previous VSG classification based on BLASTp-tree, with all three methods agreeing 93.7% of the  
224 time (Figure 2B). The HMM pipeline method agreed with BLASTp-tree typing for all patient VSGs,  
225 while the network graph approach agreed for 43/44 VSGs (Figure 2B, Figure S3, Table S4 (15)).  
226 It is not surprising that the HMM pipeline would better reflect the results of the BLASTp-tree  
227 method, as the N-terminal subtype HMM profiles were generated using VSGs classified by this  
228 method. Based on these data, we determined that the HMM method is a fast and accurate  
229 approach for determining the N-terminal domain types of unknown VSGs.

230  
231 Our N-terminal domain typing pipeline identified the domain sequence and subtype for all 44  
232 patient VSGs (Figure 2C). Of the expressed *T. b. gambiense* VSGs, 82% had type B N-terminal  
233 domains, and 50% or more of expressed VSGs within each patient were type B. This bias was  
234 not restricted to highly expressed VSGs, as 74.5% of all assembled VSG (813 of 1091 classifiable  
235 to an N-terminal subtype) were also type B.

236  
237 Using the network graph approach, we also tentatively assigned C-terminal domain types to the  
238 *T. b. gambiense* VSGs (Figure S5). In line with previous observations, we saw no evidence of  
239 domain exclusion: a C-terminal domain of one type could be paired with any type of N-terminal  
240 domain (Figure S5E) (20). Most patient C-terminal domain types were type 2, while the  
241 remaining types were predominantly type 1, with only one type 3 C-terminus identified in the  
242 patient set. Overall, these data suggest that, like N-termini, expressed VSG C-termini are also  
243 biased towards certain C-terminal types. Together, these observations motivated further  
244 investigation into the VSG domains expressed during infection by other *T. brucei* subspecies.  
245 We focused this analysis on expressed N-terminal domains which make up most of the VSG



246 protein, are more variable than C-terminal domains (15, 34), and are most likely to directly  
247 interface with the host immune system during infection (36).

**A**

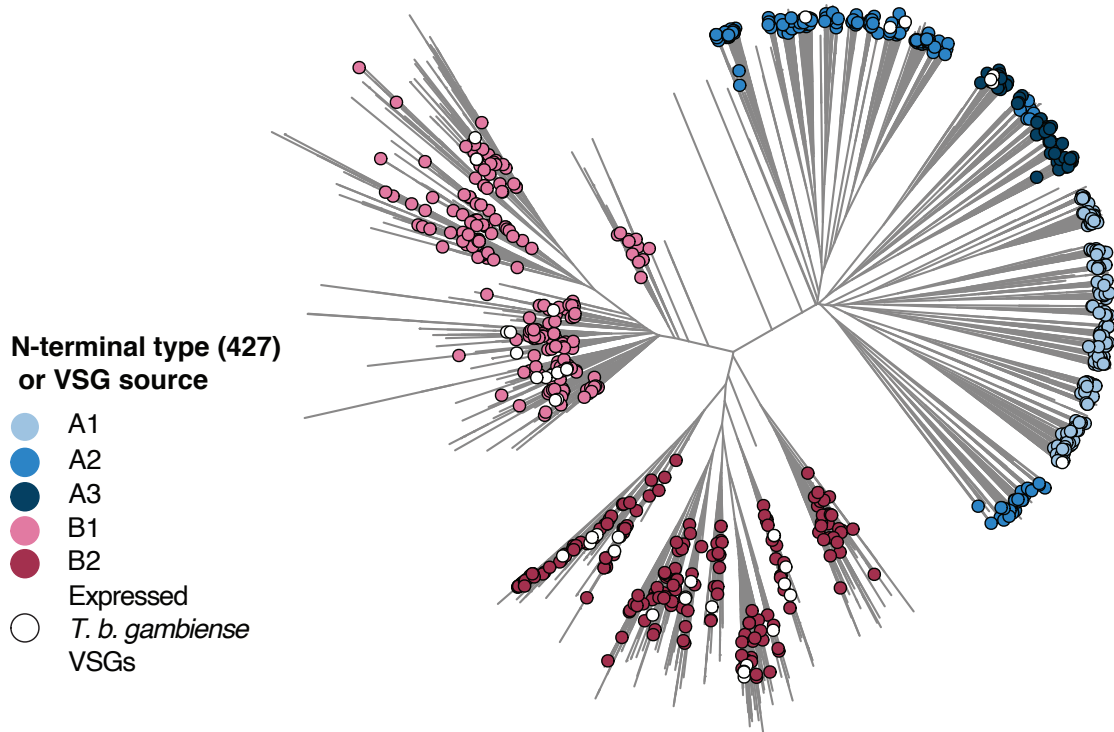

**B**

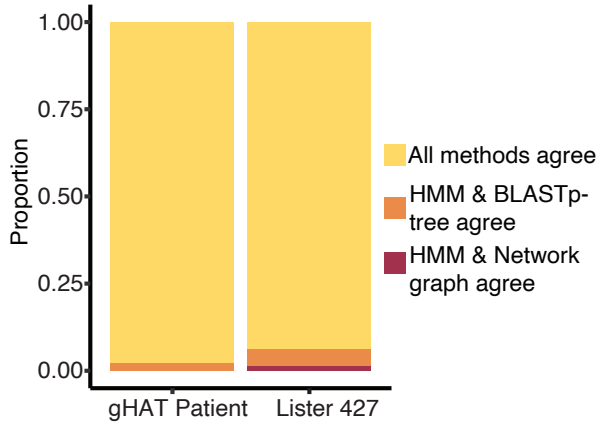

**C**

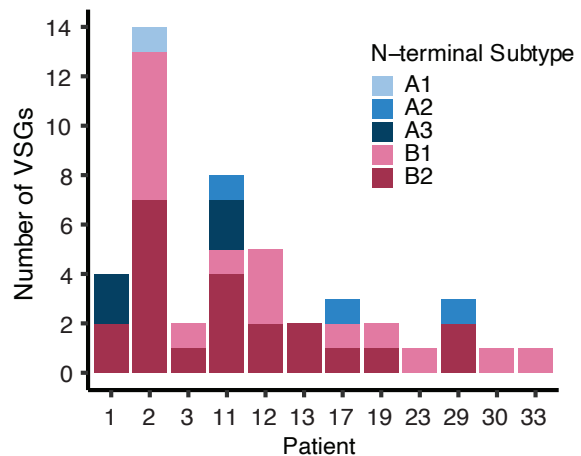

248  
249  
250  
251  
252  
253  
254  
255  
256  
257

**Figure 2. *T. b. gambiense* samples show a bias towards the expression of type B VSG.** (A) Visualization of relatedness between N-terminal domain peptide sequences inferred by Neighbor-Joining based on normalized BLASTp scores. Legend indicates classification by HMM pipeline (for Lister 427 VSGs, to highlight agreement between the two methods) or by subspecies for VSGs expressed in patients. (B) Agreement between three VSG typing methods for Lister 427 VSG set and the expressed *T. b. gambiense* patient VSG set. (C) N-terminal domain subtype composition of expressed *T. b. gambiense* VSGs as determined by HMM analysis pipeline.

258 **Type B VSG bias is unique to *T. b. gambiense* infection**

259

260 To determine whether the bias towards type B VSGs was specific to *T. b. gambiense* infections,  
261 we analyzed RNA-seq data from a published study measuring gene expression in the blood and  
262 cerebrospinal fluid (CSF) of *T. b. rhodesiense* patients in Northern Uganda (37). These libraries  
263 were prepared conventionally after either rRNA-depletion for blood or poly-A selection for CSF  
264 samples. We analyzed only those samples for which at least 10% of reads mapped to the *T.*  
265 *brucei* genome. Raw reads from these samples were subjected to the VSG-seq analysis pipeline.  
266 Because the parasitemia of these patients was much higher than in our *T. b. gambiense* study,  
267 we adjusted our expression criteria accordingly to  $\geq 0.01\%$ , the published limit of detection of VSG-  
268 seq (26). Using this approach, we identified 77 unique VSG sequences across all blood and CSF  
269 samples (Figure 3A, Figure S6). SRA, the VSG-like protein that confers human serum resistance  
270 in *T. b. rhodesiense* (38), was detected in all patient samples.

271

272 The HMM pipeline determined types for 74 of these VSG sequences; the remaining sequences  
273 appeared to be incompletely assembled, presumably due to insufficient read depth from their low  
274 level of expression. Multiple VSGs assembled in each patient (Figure 3A), and a large proportion  
275 of VSGs were expressed in multiple patients (Figure 3C). Although most VSGs detected in these  
276 patients were type B (57%, Figure 3B), this VSG type was much less predominant than in *T. b.*  
277 *gambiense* infection. Interestingly, *T. b. rhodesiense* patient CSF revealed another possible layer  
278 of diversity in VSG expression, with 5 VSGs expressed exclusively in this space.

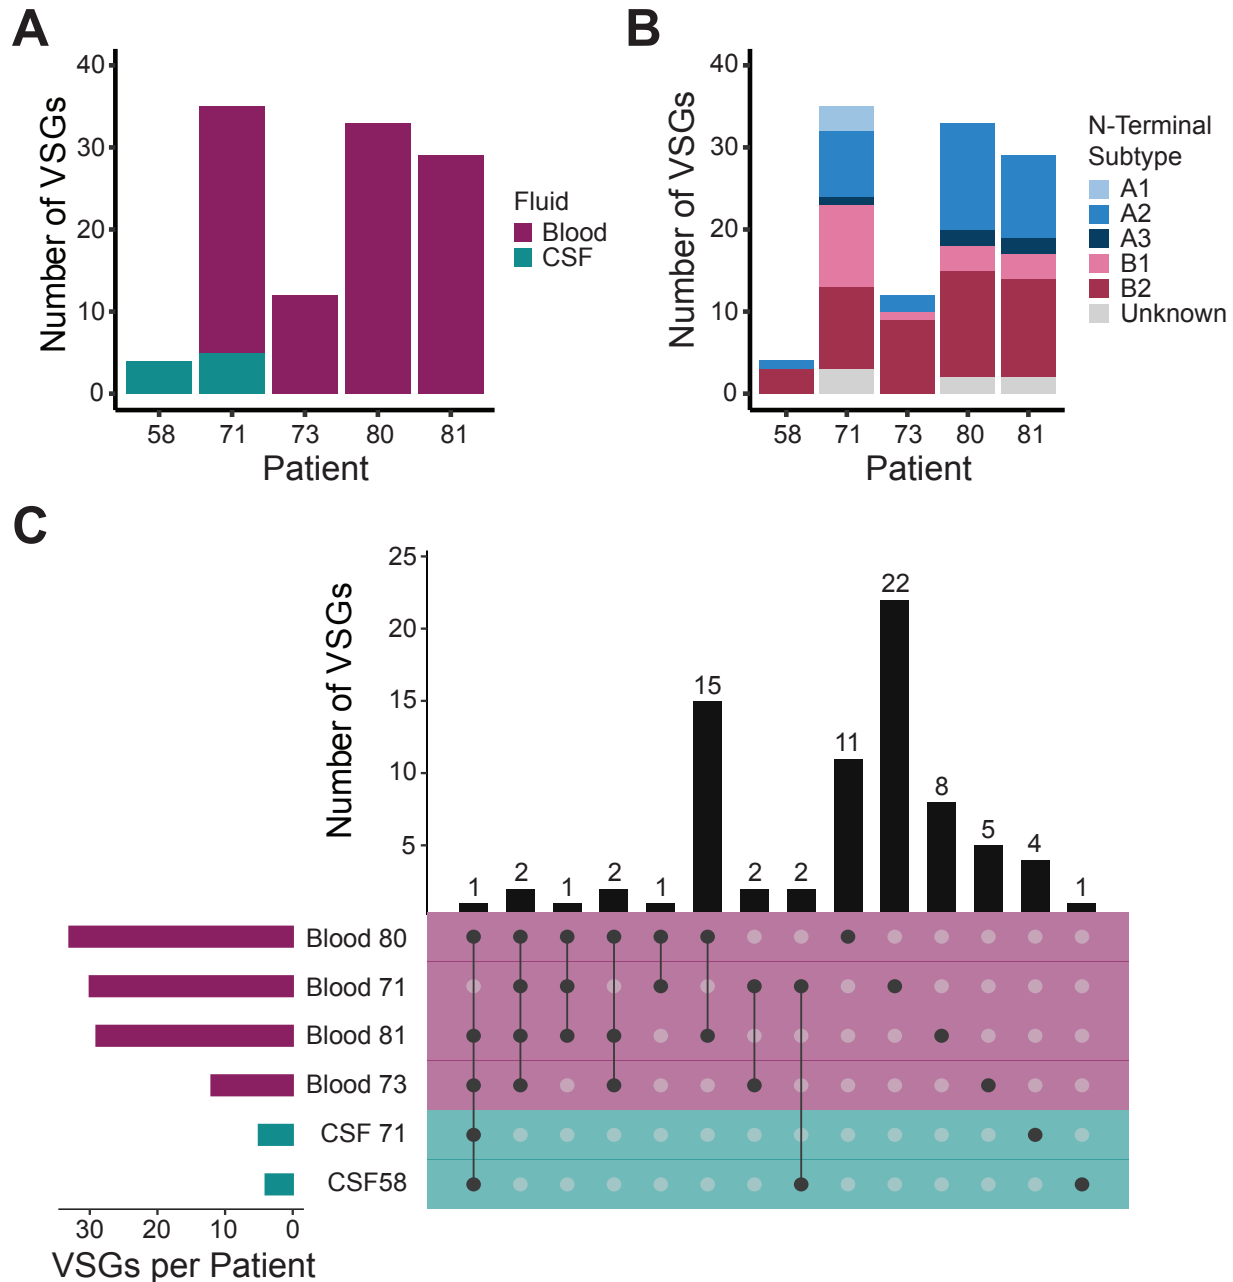

279

280 **Figure 3. *T. b. rhodesiense* samples reveal diverse VSG expression but little N-terminal**  
 281 **type bias.** (A) The total number of expressed *T. b. rhodesiense* VSGs in each patient and sample  
 282 type. Bar color represents the sample type from which RNA was extracted. (B) N-terminal domain  
 283 subtype composition of all expressed VSGs. (C) Intersections of VSGs expressed in multiple  
 284 infections. Bars on the left represent the size of the total set of VSGs expressed in each patient.  
 285 Dots represent an intersection of sets, with bars above the dots representing the size of the  
 286 intersection. Color indicates patient origin.

287

288 **The composition of the genomic VSG repertoire is reflected in expressed VSG N-terminal**  
289 **domain types**

290 One source for bias in expressed VSG type is the composition of the genomic VSG repertoire. To  
291 investigate the relationship between expressed VSG repertoires and the underlying genome  
292 composition, we took advantage of our published VSG-seq analysis of parasites isolated from  
293 mice infected with the *T. b. brucei* EATRO1125 strain. As the 'VSGnome' for this strain has been  
294 sequenced, we could directly compare the proportion of expressed N-terminal types to the full  
295 repertoire of types contained within the strain's genome. In this experiment, blood was collected  
296 over time, providing data from days 6/7, 12, 14, 21, 24, 26, and 30 post-infection in all four mice,  
297 and from days 96, 99, 102, and 105 in one of the four mice (Mouse 3). Of 192 unique VSGs  
298 identified between days 0-30, the python HMM pipeline typed 190; of 97 unique VSGs identified  
299 between days 96-105, the pipeline typed 93 VSGs. The remaining VSGs were incompletely  
300 assembled by Trinity. Our analysis of VSG types over time revealed that the predominantly  
301 expressed N-terminal domain type fluctuates between type A and type B throughout the early  
302 stages of infection and in extended chronic infections (Figure S7), but the expressed VSG  
303 repertoire across all time points generally reflects the composition of the genomic repertoire (chi-  
304 squared  $p = 0.0515$ , Figure 4A). Parasitemia did not correlate with either the diversity of VSG  
305 expression or N-terminal domain type predominance (Figure S2C).

306  
307 Unfortunately, the entire repertoire of VSGs encoded by most trypanosome strains is unknown,  
308 so such a direct comparison is impossible for *T. b. gambiense* and *T. b. rhodesiense* patient  
309 samples. Although the content of the 'core' *T. brucei* genome (containing the diploid,  
310 housekeeping genes) is similar enough among subspecies for short-read resequencing projects  
311 to be scaffolded using the TREU927 or Lister 427 reference genomes (39–41), this method  
312 cannot be applied to investigate the VSG repertoires of subspecies (or even individual parasite  
313 strains (27)). Because no near-complete VSGnome for any *T. b. rhodesiense* strain was available,  
314 we compared the makeup of *T. b. rhodesiense* expressed VSGs with the closely related and near-  
315 complete *T. b. brucei* Lister 427 repertoire (40). We observed no difference in the proportions of  
316 N-terminal types ( $p = 0.2422$ ,  $\chi^2$  test) (Figure 4B). Similarly, the proportion of N-terminal domains  
317 identified in the *T. b. gambiense* patient samples is not statistically different from the incomplete  
318 *T. b. gambiense* DAL972 genomic repertoire ( $p = 0.0575$ ) (Figure 4B). Both *T. b. gambiense*  
319 patient VSGs ( $p = 2.413e-4$ ) and the 54 VSGs identified in *T. b. gambiense* DAL972 ( $p = 0.0301$ )  
320 have A and B type frequencies that differ significantly from the Lister427 genome. Despite  
321 limitations in the available reference genomes, together these data support a model in which VSG  
322 types are drawn from the repertoire at a roughly equal frequency to their representation in the  
323 genome, with *T. b. gambiense* exhibiting an N-terminal type composition that differs from other  
324 subspecies.

325  
326

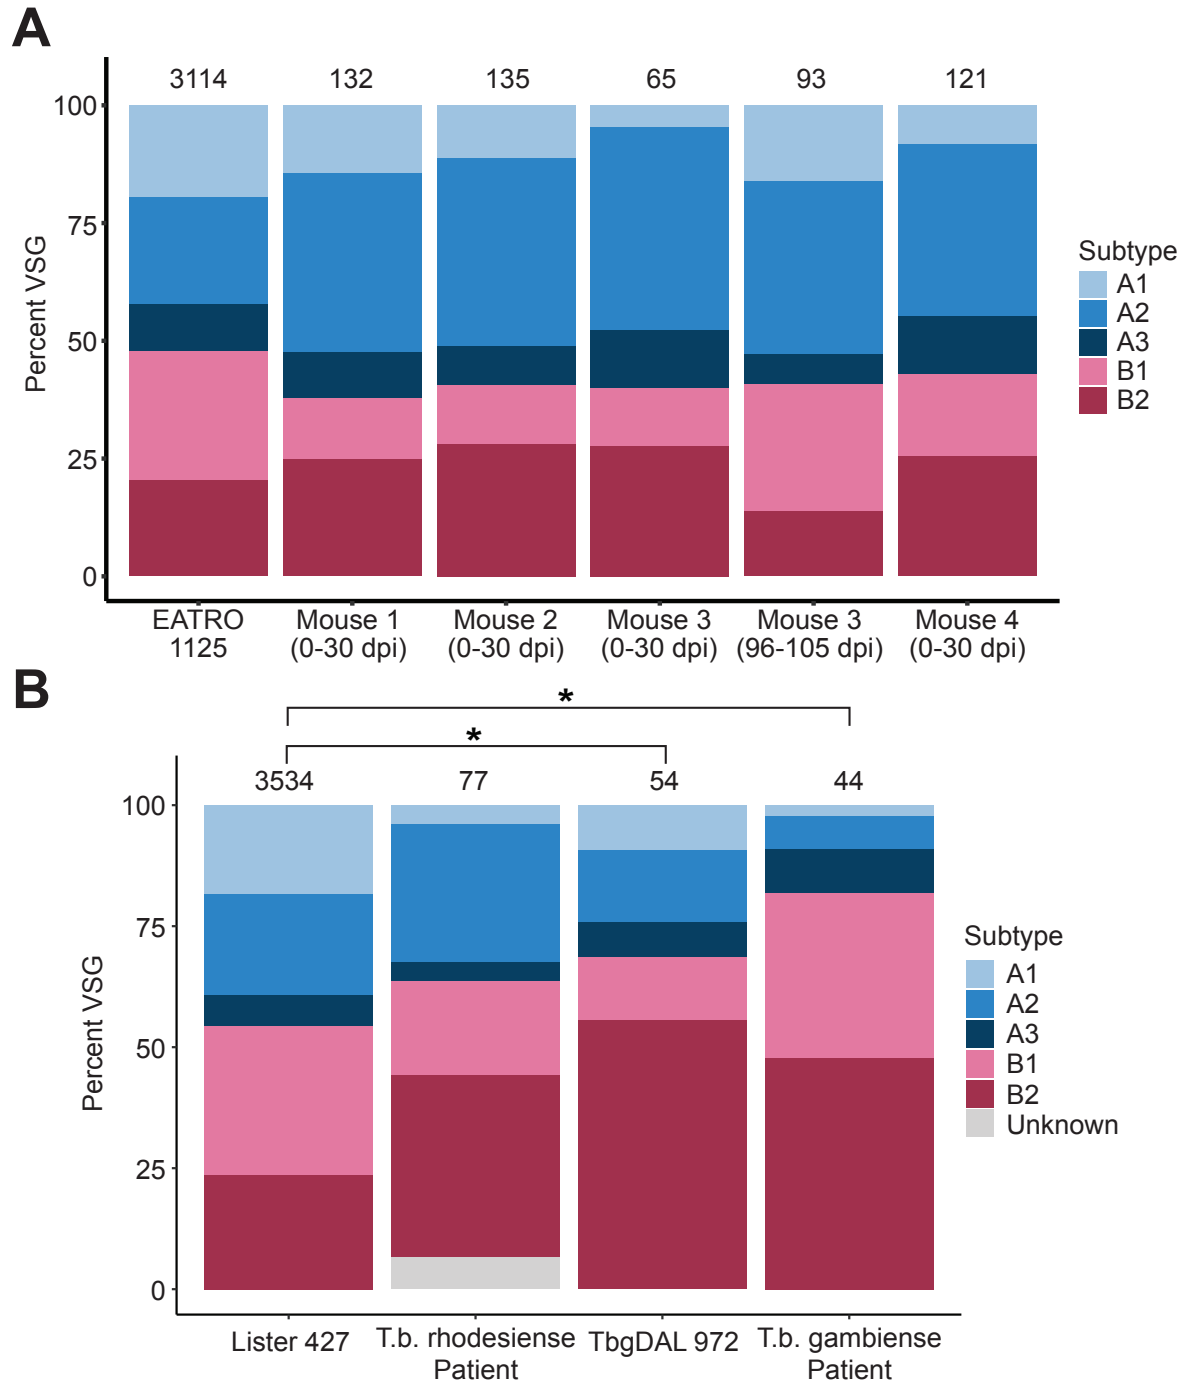

327

328 **Figure 4. VSG expression reflects the genomic VSG repertoire of the infecting parasites.**  
 329 (A) Columns show the proportion of VSG types identified in each mouse infection over all time  
 330 points and the proportion of VSG types in the infecting *T. b. brucei* strain, EATRO 1125. The total  
 331 number of unique VSG sequences is displayed above each column. (B) A comparison of the  
 332 frequencies of type A and B VSGs expressed in patients and those present in Lister 427 and  
 333 DAL972 reference genomes. Relevant statistical comparisons are shown, and asterisks denote  
 334 p-value < 0.05.

335 **VSGs expressed by *T. b. gambiense* parasites are highly diverged from those found in the**  
336 **whole genome sequences of other isolates**

337  
338 We sought to understand how the VSGs expressed in the *T. b. gambiense* patient isolates related  
339 to known *T. b. gambiense* VSG sequences and whether there was evidence of recombination  
340 within the expressed VSGs. Initial attempts to BLAST the assembled VSGs against the DAL972  
341 whole genome assembly provided very few hits even using extremely permissive settings (-  
342 word\_size 11 -evalue 0.1). This was unexpected but may reflect the relatively low coverage of the  
343 total VSG repertoire in the DAL972 genome assembly, which primarily covers the 'core' genome.  
344

345 To evaluate the relationship between the expressed VSGs and other isolates, we took advantage  
346 of publicly available short-read whole genome datasets for 36 *T. b. gambiense* strains from three  
347 groups defined by their region and date of isolation: Côte d'Ivoire 1980's, Côte d'Ivoire 2000's,  
348 and DRC 2000's (42, 43). We searched for similarity between the expressed VSGs and each  
349 isolate genome by mapping short reads to each assembled expressed VSG: regions in which  
350 reads align to a specific VSG are present somewhere in the genome of the isolate, while regions  
351 with no alignments must either be unique to gHAT patients or sufficiently diverged to no longer  
352 map.  
353

354 Using representative genes from the model organisms *C. elegans*, *D. melanogaster*, and *E. coli*  
355 as negative controls and *T. b. gambiense* GAPDH as a positive control, we determined the  
356 appropriate read length for evaluating sequence representation. The majority of each negative  
357 control gene (66.3% average across all controls) was covered by a successful alignment using  
358 20 bp sequences and allowing 2 or fewer mismatches (Figure S8A), indicating that read mapping  
359 at this length is not sufficiently specific. Increasing the sequence query length to 30bp greatly  
360 decreased mapping to the negative controls, such that an average of 1.4% of each gene was  
361 represented within the genomic datasets. The *T. b. gambiense* GAPDH control, on the other hand,  
362 retained 100% read coverage across the whole gene at all read lengths (Figure S8B). Thus, a 30  
363 bp query is of appropriate stringency to measure the sequence representation of the patient VSGs  
364 within the whole genome datasets.  
365

366 Using this query length, ~70% of the patient VSG ORF on average was absent from each genome  
367 dataset (Figure S9). Further analysis showed that C-terminal domain sequences were well  
368 represented within all genomic datasets regardless of origin (mean mapped read coverage =  
369 77.4%), while there was relatively little nucleotide sequence similarity between the isolate  
370 genomes and the N-termini expressed by parasites in gHAT patients (16.4%, Figure 5A). Aligned  
371 nucleotide coverage was significantly higher for the genomic datasets from strains also isolated  
372 in the DRC (where the gHAT patients originated) than those isolated in Côte d'Ivoire from either  
373 time period (Figure 5B), suggesting a geographic component to VSG repertoires. Nonetheless,  
374 nucleotide coverage was still very low for DRC isolates when mapping to expressed N-termini  
375 (18.4%) with no expressed VSG entirely present within the genomic datasets.  
376

377 To understand where diverged sequences occurred on the VSG protein, we modeled the regions  
378 of sequence divergence on predicted N-terminal domain monomer structures of each patient  
379 VSG. Strikingly, we found that the DNA sequences that encoded residues in the top lobe of the  
380 protein were invariably absent from all genomic datasets (Figure 5C). Overall, this analysis  
381 indicates that the VSGs expressed in the *T. b. gambiense* patient isolates are highly diverged  
382 from those within the DAL972 genome as well as from other sequenced field isolates, particularly  
383 within the parts of N-terminal domain most likely to interface with host antibody. These results are  
384 also consistent with geographic variation in *T. b. gambiense* VSG repertoires.  
385

386

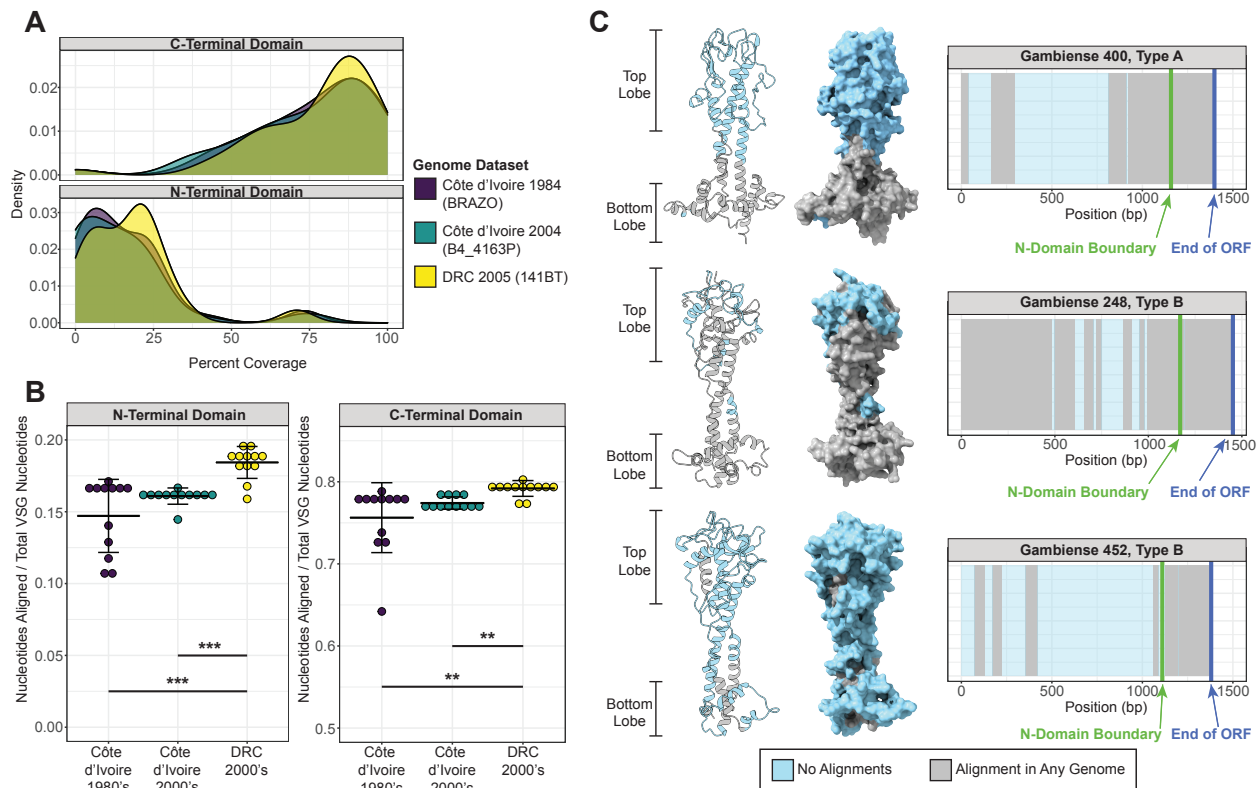

387

388

**Figure 5. Diversification is most dramatic in exposed regions of the VSG.** A) Density plot

showing the percentage of each of the patient VSG ORF sequence that had at least one whole

genome sequencing read (30bp length) align for each of three representative whole genome

datasets (n = 12 per group). The average coverage is shown by a vertical line. B) Plots comparing

sequence representation within the patient VSG N-terminal and C-terminal domains for each

group. Representation for each VSG is quantified as the proportion of nucleotides in each domain

with at least one alignment to the total number of nucleotides in that domain, with the average

representation of all VSGs for each genome shown. Crossbars indicate mean and standard

deviation within group. Significant differences between groups were determined using Kruskal-

Wallis followed by a post-hoc Dunn's test (\*\* = p-value < 0.01, \*\*\* = p-value < 0.001). C) Models

showing the predicted N-terminal domain structures of the three patient VSGs. The VSG shown

are the type A (Gambiense 248) and type B (Gambiense 452) VSGs with highest reported ORF

coverage, and a type B VSG (Gambiense 452) with average ORF coverage. Monomer structures

are oriented so the polymerization interface is away from the viewer. To the right of each model

is a map of coverage across each VSG ORF. Regions with at least one alignment from any of the

36 genomic datasets are shown in gray, and regions with no alignment are shown in blue.

404

405

## 406 Discussion

407  
408 African trypanosomes evade the host adaptive immune response through a process of antigenic  
409 variation where parasites switch their expressed VSG (44). The genome of *T. brucei* encodes a  
410 large repertoire of VSG genes, pseudogenes, and gene fragments that can be expanded  
411 continuously through recombination to form entirely novel “mosaic” VSGs (17). While antigenic  
412 variation has been studied extensively in culture and animal infection models, our understanding  
413 of the process in natural infections, particularly human infection, is limited. Most experimental  
414 mouse infections are sustained for weeks to months, while humans and large mammals may be  
415 infected for several months or even years. Additionally, laboratory studies of antigenic variation  
416 almost exclusively use *T. b. brucei*, a subspecies of *T. brucei* that, by definition, does not infect  
417 humans. The primary hurdle to exploring antigenic variation in nature has been technical: it is  
418 difficult to obtain sufficient parasite material for analysis. This is especially true for infection with  
419 *T. b. gambiense*, which often exhibits extremely low parasitemia. Here we have demonstrated the  
420 feasibility of VSG-seq to analyze VSG expression in RNA samples isolated directly from HAT  
421 patients. Our analyses reveal unique aspects of antigenic variation in *T. b. gambiense* that can  
422 only be explored by studying natural infections.

423  
424 We have identified an intriguing bias towards the expression of type B VSGs in *T. b. gambiense*  
425 infection, which appears to be specific to this *T. brucei* subspecies. Comparison of expressed  
426 VSG repertoires to publicly available genomic VSG repertoires suggests that the genomic VSG  
427 repertoire determines the distribution of VSG N-terminal types expressed during *T. brucei*  
428 infection. Thus, the *T. b. gambiense* VSG repertoire may contain a larger proportion of type B  
429 VSGs than its more virulent counterparts. Could a bias towards certain VSG types, whether due  
430 to a difference in repertoire composition or expression preference, account for unique features of  
431 *T. b. gambiense* infection, including its chronicity and primarily anthroponotic nature (45)?

432  
433 Little is known about how differences in VSG proteins relate to parasite biology or whether there  
434 could be biological consequences to the expression of specific VSG N- or C-terminal types. Type  
435 A var genes in *Plasmodium falciparum* infection are associated with severe malaria (46–50), and  
436 similar mechanisms have been hypothesized to exist in *T. vivax* and *T. congolense* infections  
437 (51–54). In *T. brucei*, several VSGs have evolved specific functions besides antigenic variation  
438 (54). The first type B VSG structure was recently solved (55), revealing a unique O-linked  
439 carbohydrate in the VSG’s N-terminal domain that interfered with the generation of protective  
440 immunity in a mouse infection model. Perhaps structural differences between each VSG type,  
441 including glycosylation patterns, could influence infection outcomes. Further research will be  
442 needed to determine whether the observed predominance of type B VSGs could influence the  
443 biology of *T. b. gambiense* infection.

444  
445 Another possibility we cannot rule out, however, is that the gHAT samples are biased due to  
446 selection by the serological test used for diagnosis. Patients were screened for *T. b. gambiense*  
447 infection using the CATT, a serological test that uses parasites expressing VSG LiTat 1.3 as an  
448 antigen. LiTat 1.3 contains a type B2 N-terminal domain (56, 57). Patients infected with parasites  
449 predominantly expressing type B VSGs may be more likely to generate antibodies that cross-  
450 react with LiTat1.3, resulting in preferential detection of these cases. In contrast, *T. b. rhodesiense*  
451 can only be diagnosed microscopically, removing the potential to introduce bias through  
452 screening. It remains to be investigated whether samples from patients diagnosed using newer  
453 screening tests, which include the invariant surface glycoprotein ISG65 and the type A VSG LiTat  
454 1.5 (23), would show similar bias towards the expression of type B VSGs.

455



456 Such a bias, if it exists, would be important to understand, as it could affect the ability to detect a  
457 subset of gHAT infections. The diversity and corresponding divergence of expressed VSGs from  
458 publicly available genomic sequences could have similar implications. Although diversity in *T. b.*  
459 *gambiense* infection appeared lower overall than previous measurements from experimental  
460 mouse infections (17, 18, 26), the correlation we observed between parasitemia and diversity in  
461 *T. b. gambiense* isolates suggests that our sampling was incomplete. Indeed, in our analysis of  
462 *T. b. rhodesiense* infection (a more reasonable comparison to mouse infection given similar  
463 expression cutoffs and parasitemia), we observed diversity similar to or higher than what has  
464 been observed in *T. b. brucei* mouse infections. Moreover, *T. b. rhodesiense* patient CSF revealed  
465 another layer of diversity in VSG expression, with 5 VSGs expressed exclusively in this space.  
466 Although this observation is difficult to interpret without information about the precise timing of  
467 sample collection, a recent study in mice showed that extravascular spaces harbor much of the  
468 antigenic diversity during infection (58). It is exciting to speculate that different organs or body  
469 compartments could harbor different sets of VSGs in humans as well.

470  
471 Overall, our analysis of VSG expression in *T. b. gambiense* and *T. b. rhodesiense* patients  
472 confirmed the long-held assumption that VSG diversity is a feature of natural infection. One  
473 potential consequence of this striking diversity is that the genomic VSG repertoire might be  
474 exploited very rapidly, creating pressure for the parasite to diversify its VSG repertoire as the  
475 mammalian host generates antibodies against each expressed VSG. Our results are consistent  
476 with this, revealing extreme divergence in the patient VSGs from 36 publicly available *T. b.*  
477 *gambiense* whole genome sequencing datasets. Even when mapping relatively short 30bp  
478 genomic sequences to each VSG, we could only find evidence for ~30% of each VSG ORF.  
479 Without assembled genomes, it is difficult to infer recombination patterns or mechanisms from  
480 this analysis. The fact that only very short stretches of homology could be found within the N-  
481 terminal domain, however, is consistent with recombination through microhomology-mediated  
482 end joining, a DNA repair mechanism that uses short stretches of homology (5-20bp) to repair  
483 DNA damage (59). This appears to be the favored form of DNA repair in the VSG expression site  
484 and has been hypothesized to play a role in VSG switching (59, 60). The data presented here  
485 suggest this mechanism, or a similar one, may play a role in diversification of the VSG repertoire  
486 as well.

487  
488 We also observed divergence between geographically separate parasite populations. Past  
489 research has shown that the sensitivity of serological tests for gHAT, which detect antibodies  
490 against the LiTat 1.3 VSG, vary regionally, potentially due to differences in the underlying genomic  
491 or expressed VSG repertoire in circulating strains (56, 57). Our data is consistent with such a  
492 possibility, with the VSGs expressed in patients from the DRC sharing more sequence similarity  
493 with isolates from the same country than those from Côte d'Ivoire. Geographic variation has been  
494 observed in *var* gene repertoires of *Plasmodium falciparum* (61) and the VSG repertoire of  
495 *Trypanosoma vivax*, another African trypanosome (53). A better understanding of such  
496 differences in *T. brucei* could inform the development of future HAT diagnostics.

497  
498 The positions of divergent regions within the VSG protein demonstrate the enormous pressure  
499 exerted by host antibody on the repertoire of *T. b. gambiense*. While the C-termini of patient VSGs  
500 were well-represented, the majority of each N-terminal sequence was undetectable in the 36  
501 genomes we analyzed. Notably, in even the most conserved VSG N-termini, sequences encoding  
502 the top lobe of the VSG were completely absent from the genomes we analyzed. VSG proteins  
503 are packed together very closely on the parasite cell surface, presumably preventing host  
504 antibody from accessing epitopes close to or within the C-terminus (36). Thus, those regions with  
505 no nucleotide similarity correspond directly to the parts of the VSG protein most likely to be  
506 exposed to host antibody.

507  
508  
509  
510  
511  
512  
513  
514  
515  
516  
517

In addition to confirming that certain aspects of antigenic variation observed in experimental *T. brucei* infection are features of natural infection, this study has revealed unique features of the process in *T. b. gambiense*. This subspecies appears to preferentially express certain VSG N-termini, which could be related to the unique biology of the parasite. Additionally, wild VSG repertoires may be more diverse than previously expected with potential geographic variation. While mouse models can recapitulate certain aspects of the process, new biology remains to be uncovered by studying antigenic variation in its natural context.

518  
519  
520  
521  
522  
523  
524  
525  
526  
527  
528  
529  
530  
531  
532  
533  
534  
535  
536  
537  
538  
539  
540  
541  
542  
543  
544  
545  
546  
547  
548  
549  
550  
551  
552  
553  
554  
555  
556  
557  
558  
559  
560  
561  
562  
563  
564  
565  
566  
567  
568

## Methods

### Ethics statement

The blood specimens from *T.b. gambiense* infected patients were collected within the projects, “Longitudinal follow-up of CATT seropositive, trypanosome negative individuals (SeroSui)” and “An integrated approach for identification of genetic determinants for susceptibility for trypanosomiasis (TrypanoGEN)” (62). In France, the SeroSui study received approval from the Comité Consultatif de Déontologie et d’Ethique (CCDE) of the French National Institute for Sustainable Development Research (IRD), May 2013 session. In Belgium, the study received approval from the Institutional Review Board of the Institute of Tropical Medicine (reference 886/13) and the Ethics Committee of the University of Antwerp (B300201318039). In the Democratic Republic of the Congo, the projects SeroSui and TrypanoGEN were approved by the Ministry of Health through the Ngaliema Clinic of Kinshasa (references 422/2013 and 424/2013). Participants gave their written informed consent to participate in the projects. For minors, additional written consent was obtained from their legal representative.

### Patient enrollment and origin map

Patients originated from the DRC and were identified over six months in the second half of 2013. This identification occurred either during passive screening at the center for HAT diagnosis and treatment at the hospital of Masi Manimba, or during active screening by the mobile team of the national sleeping sickness control program (PNLTHA) in Masi Manimba and Mosango health zones (Kwilu province, DRC).

Individuals were screened for the presence of specific antibodies in whole blood with the CATT test. For those reacting blood positive in CATT, we also tested twofold serial plasma dilutions of 1/2-1/32 were also tested and determined the CATT end titer was determined. CATT positives underwent parasitological confirmation by direct microscopic examination of lymph (if enlarged lymph nodes were present), and examination of blood by the mini-anion exchange centrifugation technique on buffy coat (63). Individuals in whom trypanosomes were observed underwent lumbar puncture. The cerebrospinal fluid was examined for white blood cell count and the presence of trypanosomes to determine the disease stage and select the appropriate treatment. Patients were questioned about their place of residence. The geographic coordinates of their corresponding villages were obtained from the Atlas of HAT (64) and plotted on a map of the DRC using ArcGIS® software by Esri. Distances were determined and a distance matrix generated (see Supplemental Table 2).

### Patient blood sample collection and total RNA isolation

A 2.5 mL volume of blood was collected from each patient in a PAXgene Blood RNA Tube. The blood was mixed with the buffer in the tube, aliquoted in 2 mL volumes and frozen in liquid nitrogen for a maximum of two weeks. After arrival in Kinshasha, tubes were stored at -70°C. Total RNA was extracted and isolated from each blood sample as previously described (65).

### Estimation of parasitemia

Two approaches were used to estimate parasitemia. First, a 9 mL volume of blood on heparin was centrifuged, 500 microliters of the buffy coat were taken up and trypanosomes were isolated using the mini-anion exchange centrifugation technique. After centrifugation of the column eluate, the number of parasites visible in the tip of the collection tube were estimated. Second, Spliced

569 Leader (SL) RNA expression levels were measured by real-time PCR as previously described  
570 (65). A Ct value was determined for each patient blood sample. Real-time PCR was performed  
571 on RNA samples before reverse transcription to verify the absence of DNA contamination.

572

573

### 574 **RNA sequencing**

575 DNase I-treated RNA samples were cleaned up with 1.8x Mag-Bind TotalPure NGS Beads  
576 (Omega Bio-Tek, # M1378-01). cDNA was generated using the SuperScript III First-strand  
577 synthesis system (Invitrogen, 18080051) according to manufacturer's instructions. 8 microliters  
578 of each sample (between 36 and 944 ng) were used for cDNA synthesis, which was performed  
579 using the oligo-dT primer provided with the kit. This material was cleaned up with 1.8x Mag-Bind  
580 beads and used to generate three replicate library preparations for each sample. These technical  
581 replicates were generated to ensure that any VSGs detected were not the result of PCR  
582 artifacts(66, 67).

583

584 Because we expected a low number of parasites in each sample, we used a nested PCR  
585 approach to prepare the VSG-seq libraries. First, we amplified *T. brucei* cDNA from the  
586 parasite/host cDNA pool by PCR using a spliced leader primer paired with an anchored oligo-dT  
587 primer (SL-1-nested and anchored oligo-dT; Supplemental Table 1). 20 cycles of PCR were  
588 completed (55°C annealing, 45s extension) using Phusion polymerase (Thermo Scientific,  
589 #F530L). PCR reactions were cleaned up with 1.8x Mag-Bind beads. After amplifying *T. brucei*  
590 cDNA, a VSG-specific PCR reaction was carried out using M13RSL and 14-mer-SP6 primers  
591 (see primers; Supplemental Table 1). 30 cycles of PCR (42°C annealing, 45s extension) were  
592 performed using Phusion polymerase. Amplified VSG cDNA was then cleaned up with 1X Mag-  
593 Bind beads and quantified using a Qubit dsDNA HS Assay (Invitrogen Q32854).

594

595 Sequencing libraries were prepared from 1 ng of each VSG PCR product using the Nextera XT  
596 DNA Library Preparation Kit (Illumina, FC-131-1096) following the manufacturer's protocol except  
597 for the final cleanup step, which was performed using 1X Mag-Bind beads. Single-end 100bp  
598 sequencing was performed on an Illumina HiSeq 2500. Raw data are available in the National  
599 Center for Biotechnology Information (NCBI) Sequence Read Archive under accession number  
600 PRJNA751607.

601

### 602 **VSG-seq analysis of *T. b. gambiense* and *T. b. rhodesiense* sequencing libraries**

603

604 To analyze both *T. b. gambiense* (VSG-seq preparations) and *T. b. rhodesiense* (traditional  
605 mRNA sequencing library preparations; sequences were obtained from ENA, accession numbers  
606 PRJEB27207 and PRJEB18523), we processed raw reads using the VSG-seq pipeline available  
607 at <https://github.com/mugnierlab/VSGSeqPipeline>. Briefly, VSG transcripts were assembled *de*  
608 *novovo* from quality- and adapter-trimmed reads for each sample (patient or patient replicate) from  
609 raw reads using Trinity (version 5.26.2) (68). Contigs containing open reading frames (ORFs)  
610 were identified as previously described (26). ORF-containing contigs were compared to Lister 427  
611 and EATRO1125 VSGs as well as a collection of known contaminating non-VSG sequences.  
612 Alignments to VSGs with an E-value below  $1 \times 10^{-10}$  that did not match any known non-VSG  
613 contaminants were identified as VSG transcripts. For *T. b. gambiense* replicate libraries, VSG  
614 ORFs identified in any patient replicate were consolidated into a sole reference genome for each  
615 patient using CD-HIT (version 4.8.1) (69) with the following arguments: -d 0 -c 0.98 -n 8 -G 1 -g 1  
616 -s 0.0 -aL 0.0. Final VSG ORF files were manually inspected.

617

618 Two *T. b. gambiense* patient VSGs (Patients 11 and 13) showed likely assembly errors. In one  
619 case, a VSG was duplicated and concatenated, and in another, two VSGs were concatenated.

620 These reference files were manually corrected (removing the duplicate or editing annotation to  
621 reflect two VSGs in the concatenated ORF) so that each VSG could be properly quantified. VSG  
622 reference databases for each patient are available at  
623 <https://github.com/mugnierlab/Tbgambiense2021/>. For *T. b. gambiense*, we then aligned reads  
624 from each patient replicate to that patient's consolidated reference genome using Bowtie with the  
625 parameters `-v 2 -m 1 -S` (version 1.2.3) (70).

626  
627 For *T. b. rhodesiense*, we aligned each patient's data to its own VSG ORF assembly. RPKM  
628 values for each VSG in each sample were generated using MULTo (version 1.0) (71), and the  
629 percentage of parasites in each population expressing a VSG was calculated as described  
630 previously (26). For *T. b. gambiense* samples, we included only VSGs with an expression  
631 measurement above 1% in two or more patient replicates in our analysis. For *T. b. rhodesiense*  
632 samples, we included only VSGs with expression  $>0.01\%$ . To compare VSG expression between  
633 patients, despite the different reference genomes used for each patient, we used CD-HIT to  
634 cluster VSG sequences with greater than 98% similarity among patients, using the same  
635 parameters used to consolidate reference VSG databases before alignment. We gave each  
636 unique VSG cluster a numerical ID (e.g., Gambiense #) and chose the longest sequence within  
637 each group to represent the cluster. Before analysis, we manually removed clusters representing  
638 TgsGP and SRA from the expressed VSG sets. UpSet plots were made with the UpSetR package  
639 (72). The R code used to analyze resulting data and generate figures is available at  
640 <https://github.com/mugnierlab/Tbgambiense2021/>.

641  
642

## 643 Analysis of VSG N-terminal domains

644  
645

### 645 Genomic VSG sequences

646 The VSG repertoires of *T. b. brucei* Lister 427 ("Lister427\_2018" assembly), *T. b. brucei*  
647 TREU927/4 and *T. b. gambiense* DAL972 were taken from TriTrypDB (v50), while the *T. b. brucei*  
648 EATRO 1125 VSGnome was used for analysis of the EATRO1125 VSG repertoire  
649 (`vsgs_tb1125_nodups_atleast250aas_pro.txt`, available at  
650 <https://tryps.rockefeller.edu/Sequences.html> or GenBank accession KX698609.1 - KX701858.1).  
651 VSG sequences from other strains (except those generated by VSG-seq) were taken from the  
652 analysis in Cross, et al. (15). Likely VSG N-termini were identified as predicted proteins with  
653 significant similarity (e-value  $\leq 10^{-5}$ ) to hidden Markov models (HMMs) of aligned type A and B  
654 VSG N-termini taken from (15).

655

### 656 N-terminal domain phylogenies

657 Phylogenies of VSG N-termini based on unaligned sequence similarities were constructed using  
658 the method described in (73) and used previously to classify VSG sequence (15). We extracted  
659 predicted N-terminal domain protein sequences by using the largest bounding envelope  
660 coordinates of a match to either type A or type B HMM. A matrix of similarities between all  
661 sequences was constructed from normalized transformed BLASTp scores as in Wickstead, et al.  
662 (73) and used to infer a neighbor-joining tree using QuickTree v1.1 (74). Trees were annotated  
663 and visualized in R with the package APE v5.2 (75).

664

### 665 HMM

666 For N-terminal typing by HMM, we used a python analysis pipeline available at  
667 ([https://github.com/mugnierlab/find\\_VSG\\_Ndomains](https://github.com/mugnierlab/find_VSG_Ndomains)). The pipeline first identifies the boundaries  
668 of the VSG N-terminal domain using the type A and type B HMM profiles generated by Cross *et*  
669 *al.* which includes 735 previously-typed VSG N-terminal domain sequences (15). N-terminal  
670 domains are defined by the largest envelope domain coordinate that meets e-value threshold

671 (1x10<sup>-5</sup>, --domE 0.00001). In cases where no N-terminal domain is identified using these profiles,  
672 the pipeline executes a “rescue” domain search in which the VSG is searched against a ‘pan-  
673 VSG’ N-terminus profile we generated using 763 previously-typed VSG N-terminal domain  
674 sequences. This set of VSGs includes several *T. brucei* strains and/or subspecies: Tb427 (559),  
675 TREU927 (138), *T. b. gambiense* DAL972 (28), EATRO795 (8), EATRO110 (5), *T. equiperdum*  
676 (4), and *T. evansi* (21). The N-terminal domain type of these VSGs were previously determined  
677 by Cross et. al (2014) by building neighbor-joining trees using local alignment scores from all-  
678 versus-all BLASTp similarity searches (15). Domain boundaries are called using the same  
679 parameters as with the type A and B profiles.

680  
681 After identifying boundaries, the pipeline extracts the sequence of the N-terminal domain, and this  
682 is searched against five subtype HMM profiles. To generate N-terminal domain subtype HMM  
683 profiles, five multiple sequence alignments were performed using Clustal Omega (76) with the  
684 763 previously-typed VSG N-terminal domain sequences described above; each alignment  
685 included the VSG N-terminal domains of the same subtype (A1, A2, A3, B1, and B2). Alignment  
686 output files in STOCKHOLM format were used to generate distinct HMM profiles for type A1, A2,  
687 A3, B1, and B2 VSGs using the pre-determined subtype classifications of the 763 VSGs using  
688 HMMer version 3.1b2 (77). The number of sequences used to create each subtype profile ranged  
689 from 75 to 211. The most probable subtype is determined by the pipeline based on the highest  
690 scoring sequence alignment against the subtype HMM profile database when HMMscan is run  
691 under default alignment parameters. The pipeline generates a FASTA file containing the amino  
692 acid sequence of each VSG N-terminus and a CSV with descriptions of the N-terminal domain  
693 including its type and subtype.

694  
695 Network graph  
696 N-terminal network graphs were made using VSG N-terminal domains from the TriTrypDB  
697 Lister427\_2018 and *T. b. gambiense* DAL972 (v50) VSG sets described above, and the *T. b.*  
698 *gambiense* and *T. b. rhodesiense* patient VSG N-termini which met our expression thresholds.  
699 Identified N-terminal domains were then subjected to an all-versus-all BLASTp. A pairwise table  
700 was created that includes each query-subject pair, the corresponding alignment E-value, and N-  
701 terminal domain type of the query sequence if previously typed in Cross, et al. (15). Pseudogenes  
702 and fragments were excluded from the Lister427\_2018 reference prior to plotting by filtering for  
703 VSG genes annotated as pseudogenes and any less than 400 amino acids in length, as the  
704 remaining sequences are most likely to be full length VSG. Network graphs were generated with  
705 the igraph R package(78) using undirected and unweighted clustering of nodes after applying link  
706 cutoffs based on E-value < 10<sup>-2</sup>. The leading eigenvector clustering method (35) was used to  
707 detect and assign nodes to communities based on clustering (cluster\_leading\_eigen() method in  
708 igraph).

709  
710 **Analysis of VSG C-terminal domains**  
711 VSG C-termini were extracted from expressed *T. b. gambiense* VSGs, *T.b. gambiense* DAL972  
712 (v50), and 545 previously-typed VSG C-termini from the Lister 427 strain using the C-terminal  
713 HMM profile generated by Cross et al. (15) and the same HMMscan parameters as for N-termini  
714 (E-value < 1x10<sup>-5</sup>; largest domain based on envelope coordinates). An all-vs-all BLASTp was  
715 performed on these sequences, and network graphs were generated in the same manner as the  
716 N-terminal network graphs. Links were drawn between C-termini with a BLASTp E-value 1x10<sup>-3</sup>.  
717 The leading eigenvector method for clustering (35) was used to detect and assign nodes to  
718 communities based on clustering (cluster\_leading\_eigen() method in igraph).

719  
720  
721

722 **Comparison of gHAT patient VSGs to sequenced whole genomes of *T.b. gambiense***  
723 **isolates**

724 Publicly available whole genome Illumina sequencing reads for 24 *T.b. gambiense* isolates from  
725 Côte d'Ivoire were fetched from the ENA database and 12 datasets for isolates from the DRC  
726 were downloaded from DataDryad. All datasets analyzed exist as raw sequencing reads and do  
727 not have associated ORF assemblies or VSG gene annotations. We therefore determined the  
728 presence or absence of sequences similar to patient VSG by alignment. Raw reads were adapter  
729 and quality trimmed using Trim\_Galore (version 0.5.0) under default parameters and truncated to  
730 desired query lengths of 20, 30, and 50 bp using Trimmomatic (79) (version 0.38) 'CROP' option.  
731 Whole genome sequence datasets were aligned to the assembled patient VSG nucleotide  
732 sequences using Bowtie with the parameters -v 2 -a -S (version 1.1.1). Bowtie does not support  
733 gapped alignments and the number of mismatched bases per read can be adjusted to control the  
734 stringency of alignments, therefore this aligner was used to assess the size of regions of sequence  
735 similarity between the patient VSG and genomic sequences. Bedtools (80) (version 2.27.0)  
736 genomecov was used to summarize alignment coordinates and read depth for downstream  
737 analysis. Alignment ranges were plotted with the IRanges R package(81). Patient VSG gene  
738 coverage was calculated as the regions of sequence with an aligned read depth of at least one  
739 divided by the full ORF sequence or domain length in bp.

740  
741 To model regions of sequence divergence and similarity, the secondary structures for each of  
742 the 44 gHAT patient VSG were predicted using Phyre2 (82) batch processing under default  
743 parameters. Automated threading returned hits to VSG N-terminal domain chain templates from  
744 the PDB with 100% confidence for all patient VSG. Predicted structures were visualized and  
745 figures generated in ChimeraX (83).

746 **Acknowledgments**

747

748 We are very grateful to the patients without whom this work would not have been possible. We  
749 thank George Cross and Danae Schulz for comments on the manuscript, and Mary Gebhardt for  
750 help with GIS. The Atlas of HAT is an initiative of the World Health Organization (WHO), jointly  
751 implemented with the Food and Agriculture Organization of the United Nations (FAO) in the  
752 framework of the Programme Against African Trypanosomiasis (PAAT). Field work and specimen  
753 collection in DRC were funded through the Wellcome Trust (study number 099310/Z/12/Z)  
754 awarded to the TrypanoGEN Consortium ([www.trypanogen.net](http://www.trypanogen.net)), members of H3Africa  
755 ([h3africa.org](http://h3africa.org)). Sample work-up was supported by the Research Foundation Flanders (FWO grant  
756 1501413N). Work by BW was supported by University of Nottingham/Wellcome Trust Institutional  
757 Strategic Support Fund award 204843/Z/16/Z. MRM and SS were supported by Office of the  
758 Director, NIH (DP5OD023065). JS is supported by NIH T32AI007417.

759

760 **Supplement**

761

762 **Supplemental Table 1. Primer sequences.**

763

764 **Supplemental Table 2. gHAT patient distance matrix.**

765

766 **Supplemental Table 3. gHAT VSG expression data.**

767

768 **Supplemental Table 4. Tables comparing BLAST-tree, HMMscan, and network plot typing**  
769 **methods.**

770

771 **Supplemental Table 5. rHAT VSG expression data.**

772





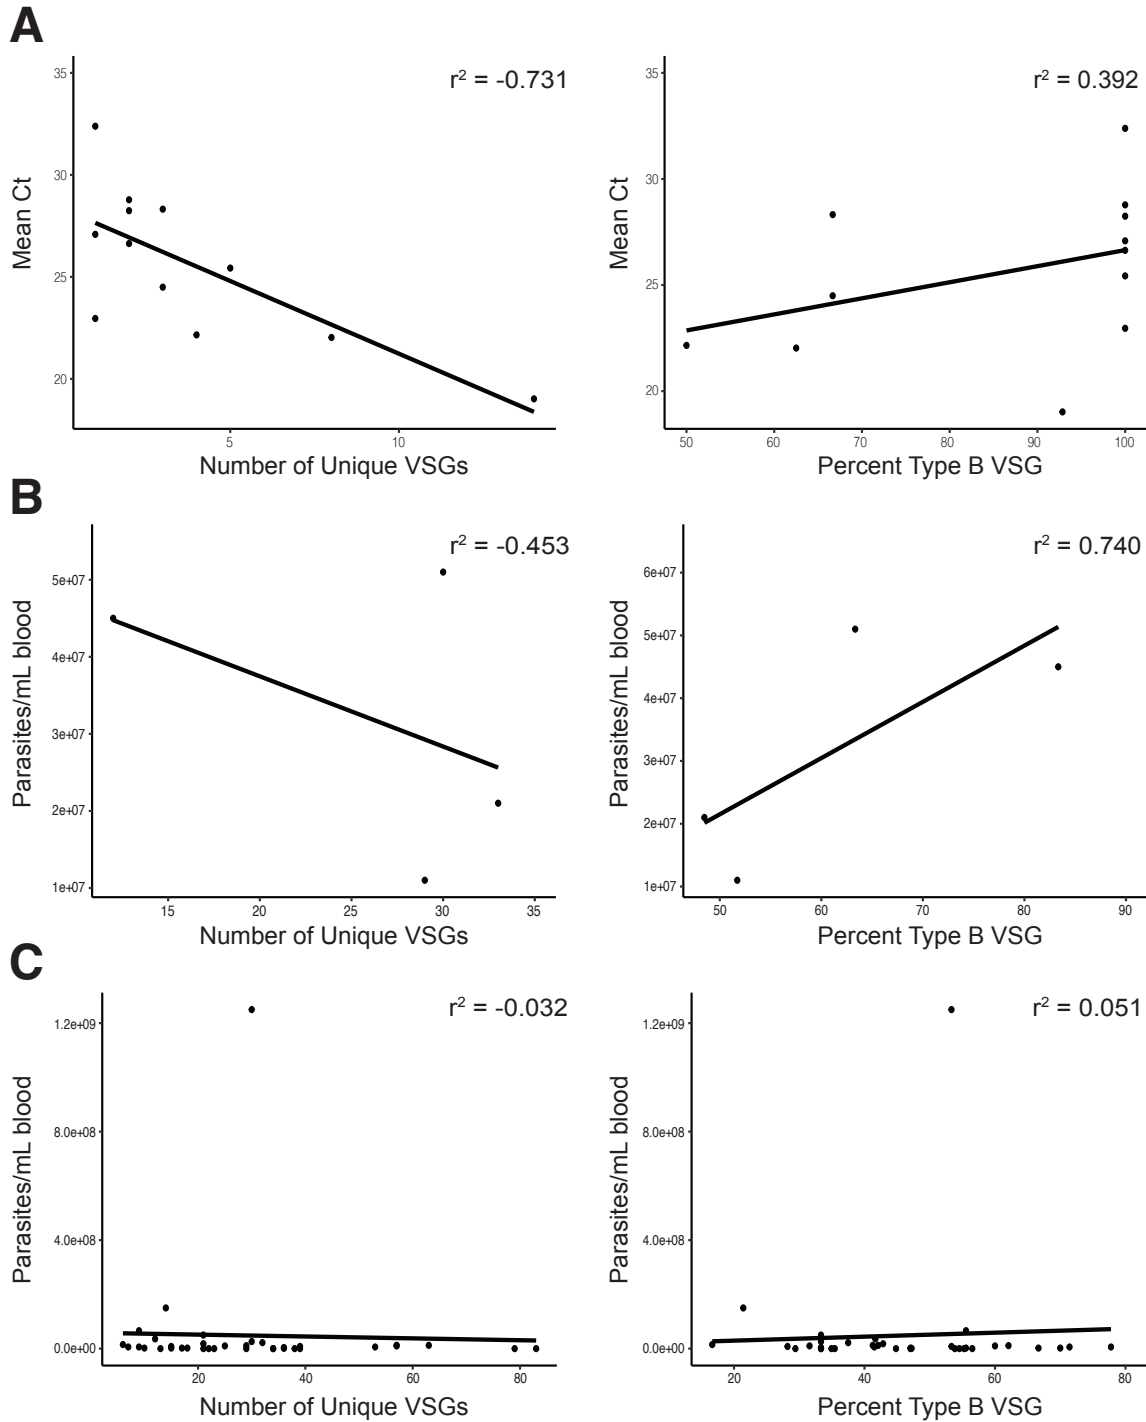

778  
779  
780  
781  
782  
783  
784  
785

**Supplemental Figure 2. Correlation between parasitemia and diversity and N-terminal type distribution.** (A) Correlation plots for *T.b. gambiense* infected patients. (B) Correlation plots for *T.b. rhodesiense* infected patients from Mulindwa et al. 2018. (C) Correlation plots for VSG diversity and percent of N-terminal domain type B for *T.b. brucei* infected mice from Mugnier et al. 2015.

786  
787

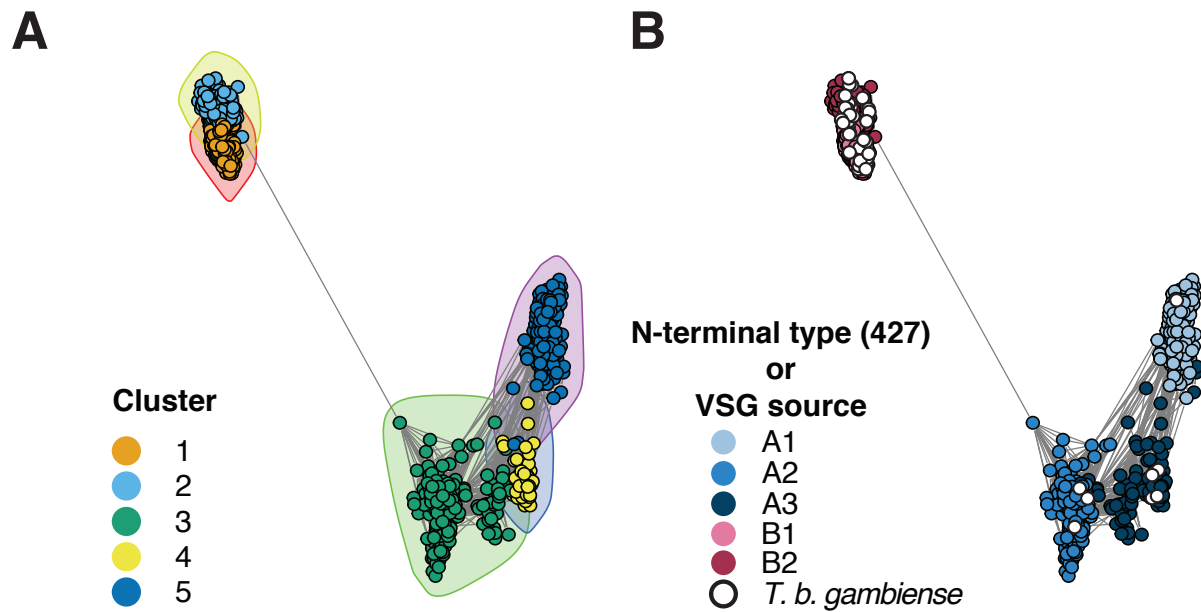

788  
789  
790  
791  
792  
793  
794  
795

**Supplemental Figure 3.** (A) Network plot showing peptide sequence relatedness between N-terminal domains. Each point represents a VSG N-terminus. A link was drawn between points if the BLASTp e-value was less than  $10^{-2}$ . Colors and shaded circles represent community assignments determined by the clustering algorithm. (B) The same graph as in (A), but points are manually colored by known N-terminal subtype from Cross et al. or by subspecies for VSGs identified in patients.

796  
797  
798  
799  
800

**Supplemental Figure 4. BLASTp-tree of all *T. b. gambiense* VSGs.** File attached.

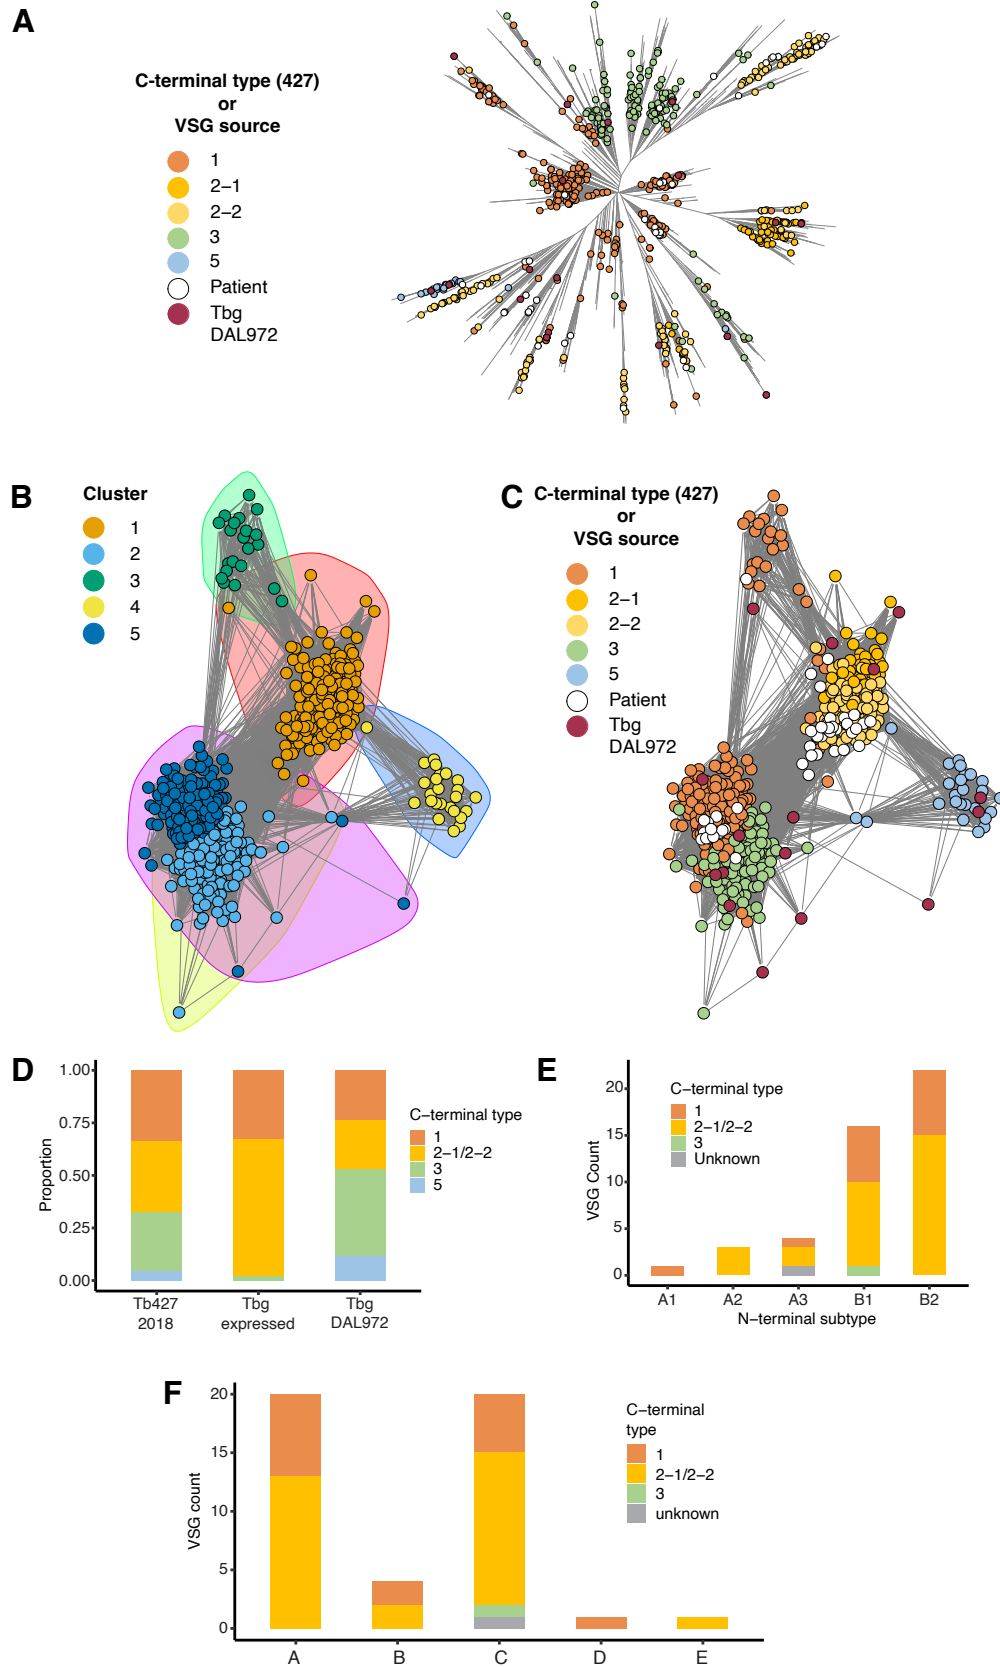

802 **Supplemental Figure 5. Expressed VSG C-termini are primarily type 1 and type 2.** A)  
803 BLASTp-tree of C-terminal domains. Points are colored based on previously determined C-  
804 terminal type from Cross et al. or by the source of the sequence (genomic or expressed) for *T. b.*  
805 *gambiense* VSGs. B) Network plot showing peptide sequence relatedness between C-terminal  
806 domains in *T. b. gambiense* expressed VSGs. Each point represents a VSG C-terminus. A link  
807 was drawn between points if the BLASTp e-value was less than  $1 \times 10^{-3}$ . Points are colored by the  
808 cluster determined by the clustering algorithm. Shaded circles also indicate clusters. C) Same  
809 network plot as in B but colored by previously determined C-terminal type from Cross et al., or by  
810 source for unclassified genomic or expressed VSGs. D) VSG C-terminal types, based on cluster  
811 assignment visualized in panel B, in genomic and expressed VSG sets. E) Pairing of C- and N-  
812 termini in *T. b. gambiense* patients. F) C-termini detected in each patient village.  
813  
814

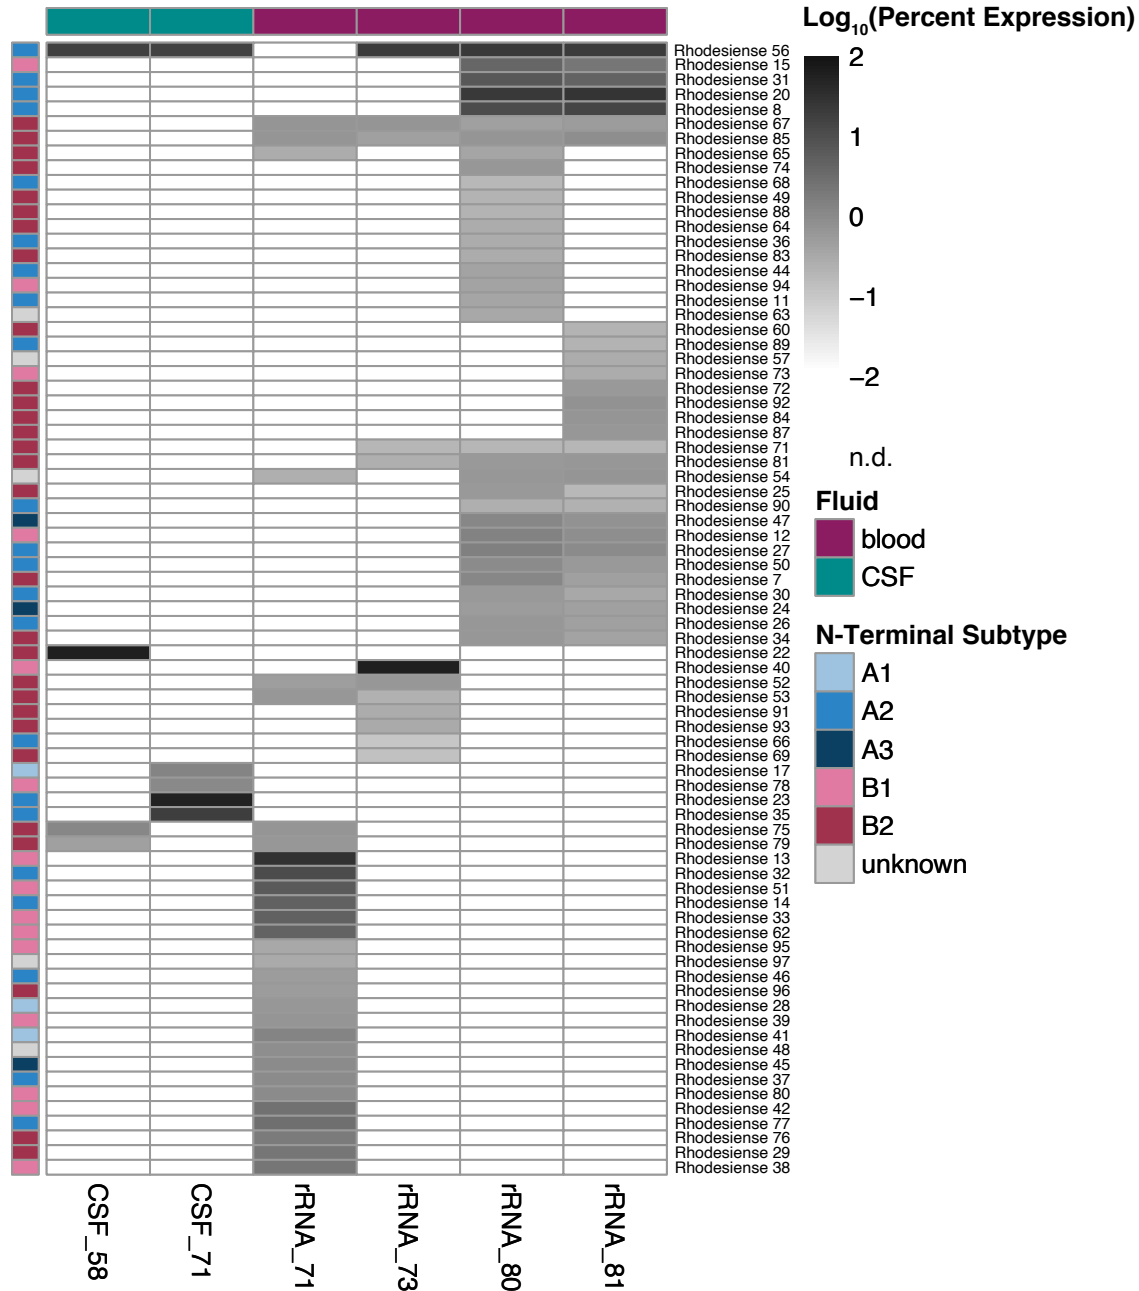

815  
816 **Supplemental Figure 6. Heatmap of all assembled *T. b. rhodesiense* patient VSGs.**  
817 Greyscale shows log<sub>10</sub> of the estimated percentage of the parasite population expressing each  
818 VSG. Variants expressed by less than 0.01% of parasites considered not detected (n.d.).

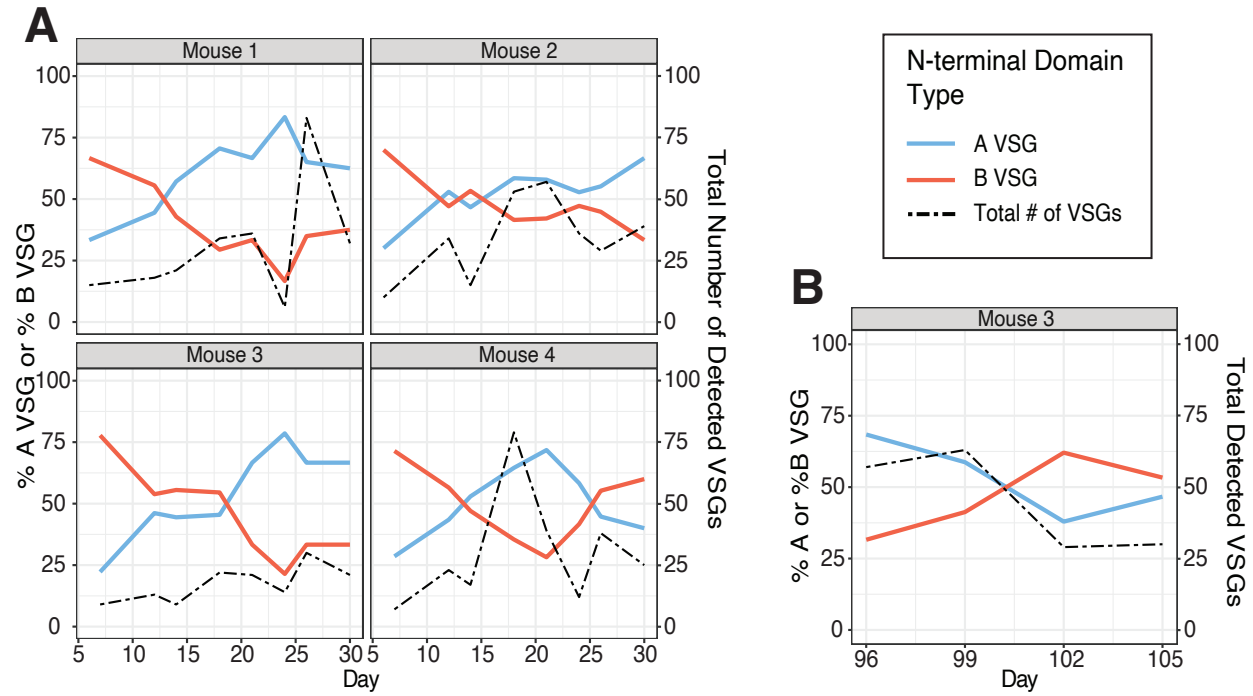

819

820 **Supplemental Figure 7. VSG N-terminal type composition fluctuates over the course of**  
821 **infection in mice.** Proportions of N-terminal domain types expressed in *T. b. brucei* infected mice  
822 over time. The black dotted line represents the total number of identified VSGs. A) N-terminal type  
823 composition days 0-30. B) Type composition days 96-105.

824



A

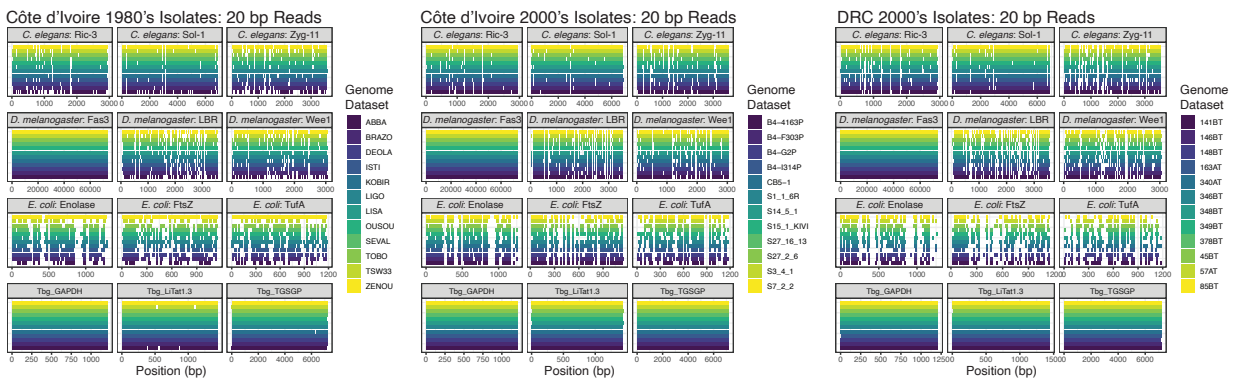

B

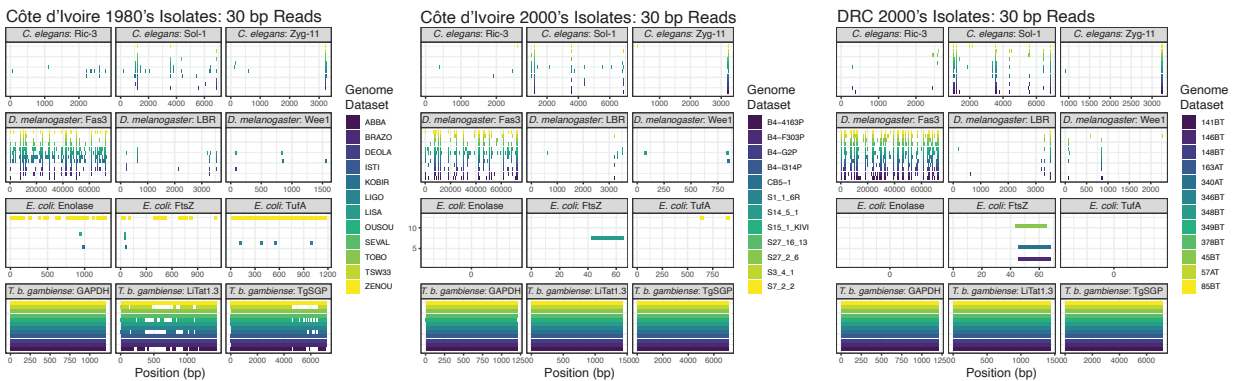

825

826 **Supplemental Figure 8. Mapping controls show how read size affects stringency of**  
 827 **alignments, and support presence of sequences within datasets.** A) Base pair coordinates  
 828 of bowtie alignment ranges using 20 bp read lengths and allowing 2 mismatches for each of the  
 829 36 whole genome datasets. Positions of alignment hits are shown on the x-axis and each facet  
 830 shows results for the 9 negative controls as well as 3 *T. b. gambiense* gene positive controls. The  
 831 negative controls are randomly selected genes from other model organisms. B) Base pair  
 832 coordinates for the same set of positive and negative gene mapping controls using 30 bp read  
 833 lengths and allowing 2 mismatches. Coverage of the negative control genes is greatly reduced,  
 834 while the *T. b. gambiense* gene positive controls still have alignment hits across the entirety of  
 835 the gene.  
 836

**A**

Position and Range of Bowtie Alignments: 30bp query  $\leq$  2 mismatches

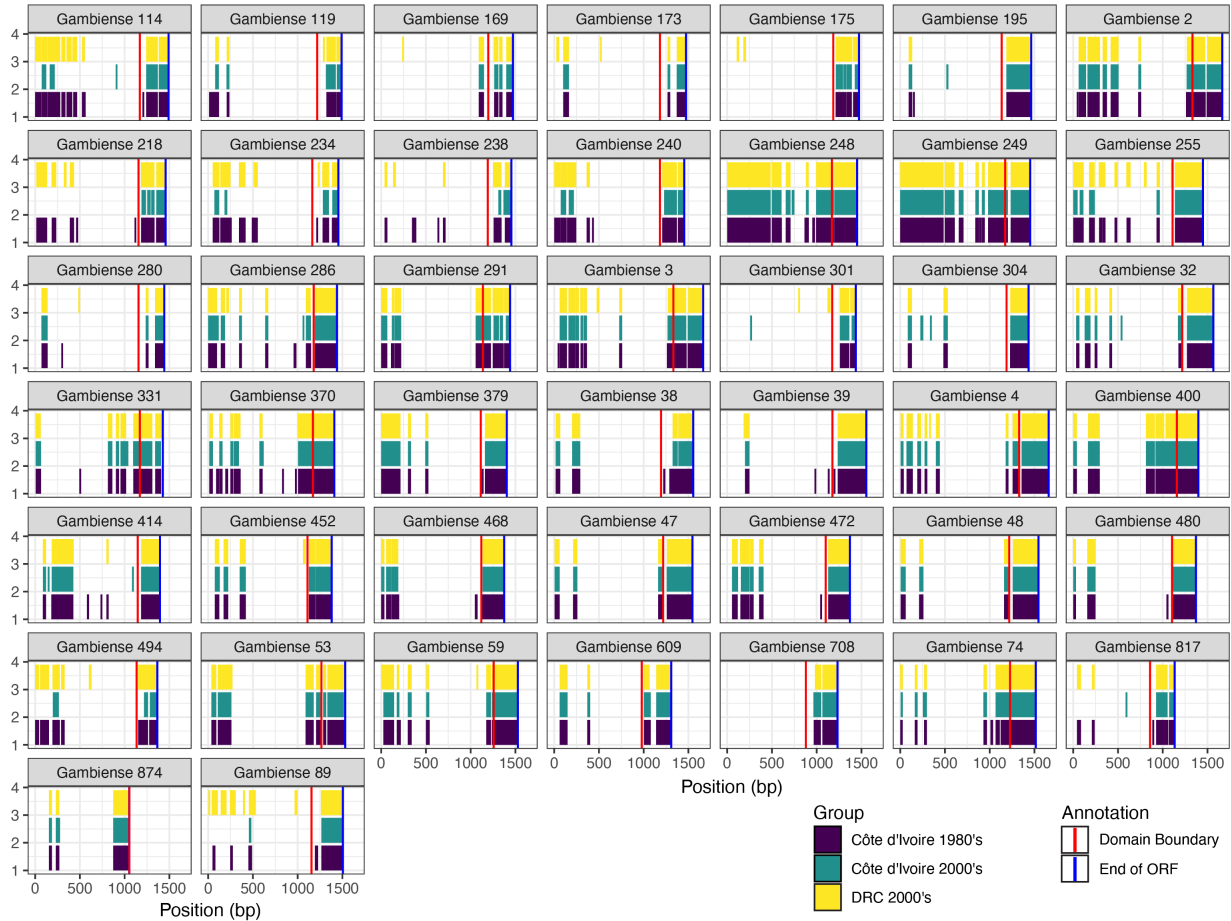

837  
838  
839  
840  
841  
842  
843  
844

**Supplemental Figure 9. Summary of Bowtie alignment hits for each assembled gHAT patient VSG against the genomic sequences.** A) Base-pair coordinates of each patient VSG are plotted as the X-axis, and each facet designates the patient VSG as well as the full ORF sequence length. Bars color-coded by genome dataset group show alignment length and position within the VSG ORF sequence for genomic sequence fragments of 30bp in length.

## 845 References

- 846 1. G. Romero-Meza, M. R. Mugnier, *Trypanosoma brucei*. *Trends Parasitol.* (2019)  
847 <https://doi.org/10.1016/j.pt.2019.10.007>.
- 848 2. P. Büscher, G. Cecchi, V. Jamonneau, G. Priotto, Human African trypanosomiasis.  
849 *www.thelancet.com* **390** (2017).
- 850 3. J. R. Franco, *et al.*, Monitoring the elimination of human African trypanosomiasis at  
851 continental and country level: Update to 2018. *PLoS Negl. Trop. Dis.* **14**, e0008261  
852 (2020).
- 853 4. P. G. E. Kennedy, J. Rodgers, Clinical and neuropathogenetic aspects of human African  
854 trypanosomiasis. *Front. Immunol.* **10** (2019).
- 855 5. J. R. Franco, *et al.*, Monitoring the elimination of human African trypanosomiasis at  
856 continental and country level: Update to 2018. *PLoS Negl. Trop. Dis.* **14**, e0008261  
857 (2020).
- 858 6. WHO, The Global Health Observatory. *WHO* (August 17, 2021).
- 859 7. WHO, “Ending the neglect to attain the sustainable development goals: a road map for  
860 neglected tropical diseases 2021–2030” (2020).
- 861 8. S. Magez, G. Caljon, T. Tran, B. Stijlemans, M. Radwanska, Current status of vaccination  
862 against African trypanosomiasis. *Parasitology* **137**, 2017–2027 (2010).
- 863 9. S. Trindade, *et al.*, *Trypanosoma brucei* Parasites Occupy and Functionally Adapt to the  
864 Adipose Tissue in Mice. *Cell Host Microbe* **19**, 837–848 (2016).
- 865 10. S. S. Pereira, S. Trindade, M. De Niz, L. M. Figueiredo, Tissue tropism in parasitic  
866 diseases. *Open Biol.* **9** (2019).
- 867 11. M. Camara, *et al.*, Extravascular Dermal Trypanosomes in Suspected and Confirmed  
868 Cases of gambiense Human African Trypanosomiasis. *Clin. Infect. Dis.* **73**, 12–20 (2021).
- 869 12. O. A. Alfituri, B. M. Bradford, E. Paxton, L. J. Morrison, N. A. Mabbott, Influence of the  
870 Draining Lymph Nodes and Organized Lymphoid Tissue Microarchitecture on  
871 Susceptibility to Intradermal *Trypanosoma brucei* Infection. *Front. Immunol.* **11** (2020).
- 872 13. L. Marcello, J. D. Barry, Analysis of the VSG gene silent archive in *Trypanosoma brucei*  
873 reveals that mosaic gene expression is prominent in antigenic variation and is favored by  
874 archive substructure. *Genome Res.* **17**, 1344–1352 (2007).
- 875 14. M. Berriman, *et al.*, The genome of the African trypanosome *Trypanosoma brucei*. *Sci.*  
876 *(New York, NY)* **309**, 416–422 (2005).
- 877 15. G. A. M. Cross, H.-S. Kim, B. Wickstead, Capturing the variant surface glycoprotein  
878 repertoire (the VSGnome) of *Trypanosoma brucei* Lister 427. *Mol. Biochem. Parasitol.*  
879 **195**, 59–73 (2014).
- 880 16. L. S. M. Müller, *et al.*, Genome organization and DNA accessibility control antigenic  
881 variation in trypanosomes. *Nature* **563**, 121–125 (2018).
- 882 17. J. P. J. Hall, H. Wang, J. D. Barry, Mosaic VSGs and the scale of *Trypanosoma brucei*  
883 antigenic variation. *PLoS Pathog.* **9**, e1003502 (2013).
- 884 18. S. Jayaraman, *et al.*, Application of long read sequencing to determine expressed antigen  
885 diversity in *Trypanosoma brucei* infections. *PLoS Negl. Trop. Dis.* **13**, e0007262 (2019).
- 886 19. N. Van Meirvenne, E. Magnus, P. Büscher, Evaluation of variant specific trypanolysis  
887 tests for serodiagnosis of human infections with *Trypanosoma brucei* gambiense. *Acta*  
888 *Trop.* **60**, 189–199 (1995).
- 889 20. E. Magnus, T. Vervoort, N. Van Meirvenne, A card-agglutination test with stained  
890 trypanosomes (C.A.T.T.) for the serological diagnosis of *T. b. gambiense*  
891 trypanosomiasis. *Ann. Soc. Belg. Med. Trop. (1920)*. **58**, 169–176 (1978).
- 892 21. S. Bisser, *et al.*, Sensitivity and Specificity of a Prototype Rapid Diagnostic Test for the  
893 Detection of *Trypanosoma brucei* gambiense Infection: A Multi-centric Prospective Study.  
894 *PLoS Negl. Trop. Dis.* **10**, e0004608 (2016).
- 895 22. P. Büscher, *et al.*, Sensitivity and specificity of HAT Sero-K-SeT, a rapid diagnostic test

- 896 for serodiagnosis of sleeping sickness caused by *Trypanosoma brucei gambiense*: A  
897 case-control study. *Lancet Glob. Heal.* **2**, e359–e363 (2014).
- 898 23. C. Lumbala, *et al.*, Prospective evaluation of a rapid diagnostic test for *Trypanosoma*  
899 *brucei gambiense* infection developed using recombinant antigens. *PLoS Negl. Trop. Dis.*  
900 **12**, e0006386 (2018).
- 901 24. P. Dukes, *et al.*, “Absence of the LiTat 1.3 (CATT antigen) gene in *Trypanosoma brucei*  
902 *gambiense* stocks from Cameroon” (1992).
- 903 25. J. C. K. Enyaru, R. Allingham, T. Bromidge, G. D. Kanmogne, J. F. Carasco, “The  
904 isolation and genetic heterogeneity of *Trypanosoma brucei gambiense* from north-west  
905 Uganda” (1993).
- 906 26. M. R. Mugnier, G. A. M. Cross, F. N. Papavasiliou, The in vivo dynamics of antigenic  
907 variation in *Trypanosoma brucei*. *Science (80-. )*. **347**, 1470–1473 (2015).
- 908 27. O. C. Hutchinson, *et al.*, Variant Surface Glycoprotein gene repertoires in *Trypanosoma*  
909 *brucei* have diverged to become strain-specific. *BMC Genomics* **8**, 234 (2007).
- 910 28. P. González-Andrade, *et al.*, Diagnosis of trypanosomatid infections: targeting the spliced  
911 leader RNA. *J. Mol. Diagn.* **16**, 400–404 (2014).
- 912 29. M. Berberof, D. Pérez-Morga, E. Pays, A receptor-like flagellar pocket glycoprotein  
913 specific to *Trypanosoma brucei gambiense*. *Mol. Biochem. Parasitol.* **113**, 127–138  
914 (2001).
- 915 30. M. Carrington, *et al.*, Variant specific glycoprotein of *Trypanosoma brucei* consists of two  
916 domains each having an independently conserved pattern of cysteine residues. *J. Mol.*  
917 *Biol.* **221**, 823–835 (1991).
- 918 31. O. C. Hutchinson, *et al.*, VSG structure: similar N-terminal domains can form functional  
919 VSGs with different types of C-terminal domain. *Mol. Biochem. Parasitol.* **130**, 127–131  
920 (2003).
- 921 32. N. G. Jones, *et al.*, Structure of a glycosylphosphatidylinositol-anchored domain from a  
922 trypanosome variant surface glycoprotein. *J. Biol. Chem.* **283**, 3584–3593 (2008).
- 923 33. A. Schwede, N. Jones, M. Engstler, M. Carrington, The VSG C-terminal domain is  
924 inaccessible to antibodies on live trypanosomes. *Mol. Biochem. Parasitol.* **175**, 201–204  
925 (2011).
- 926 34. J. L. Weirather, M. E. Wilson, J. E. Donelson, Mapping of VSG similarities in  
927 *Trypanosoma brucei*. *Mol. Biochem. Parasitol.* **181**, 141–152 (2012).
- 928 35. M. E. J. Newman, Finding community structure in networks using the eigenvectors of  
929 matrices. *Phys. Rev. E* **74**, 036104 (2006).
- 930 36. A. Schwede, N. Jones, M. Engstler, M. Carrington, The VSG C-terminal domain is  
931 inaccessible to antibodies on live trypanosomes. *Mol. Biochem. Parasitol.* **175**, 201–204  
932 (2011).
- 933 37. J. Mulindwa, *et al.*, Transcriptomes of *Trypanosoma brucei rhodesiense* from sleeping  
934 sickness patients, rodents and culture: Effects of strain, growth conditions and RNA  
935 preparation methods. *PLoS Negl. Trop. Dis.* **12**, e0006280 (2018).
- 936 38. C. De Greef, R. Hamers, The serum resistance-associated (SRA) gene of *Trypanosoma*  
937 *brucei rhodesiense* encodes a variant surface glycoprotein-like protein. *Mol. Biochem.*  
938 *Parasitol.* **68**, 277–284 (1994).
- 939 39. A. P. Jackson, *et al.*, The genome sequence of *Trypanosoma brucei gambiense*,  
940 causative agent of chronic human African Trypanosomiasis. *PLoS Negl. Trop. Dis.* **4**  
941 (2010).
- 942 40. M. Siström, *et al.*, De Novo Genome Assembly Shows Genome Wide Similarity between  
943 *Trypanosoma brucei brucei* and *Trypanosoma brucei rhodesiense*. *PLoS One* **11**,  
944 e0147660 (2016).
- 945 41. M. Siström, *et al.*, Comparative genomics reveals multiple genetic backgrounds of human  
946 pathogenicity in the *trypanosoma brucei* complex. *Genome Biol. Evol.* **6**, 2811–2819

- 947 (2014).
- 948 42. J. B. Richardson, *et al.*, Whole genome sequencing shows sleeping sickness relapse is  
949 due to parasite regrowth and not reinfection. *Evol. Appl.* **9**, 381–393 (2016).
- 950 43. W. Weir, *et al.*, Population genomics reveals the origin and asexual evolution of human  
951 infective trypanosomes. *Elife* **5** (2016).
- 952 44. M. R. Mugnier, C. E. Stebbins, F. N. Papavasiliou, Masters of Disguise: Antigenic  
953 Variation and the VSG Coat in *Trypanosoma brucei*. *PLOS Pathog.* **12**, e1005784 (2016).
- 954 45. P. Büscher, *et al.*, Do Cryptic Reservoirs Threaten Gambiense-Sleeping Sickness  
955 Elimination? *Trends Parasitol.* **34**, 197–207 (2018).
- 956 46. K. Kirchgatter, H. A. del Portillo, Association of Severe Noncerebral Plasmodium  
957 falciparum Malaria in Brazil With Expressed PfEMP1 DBL1 $\alpha$  Sequences Lacking  
958 Cysteine Residues. *Mol. Med.* **2002 81 8**, 16–23 (2002).
- 959 47. P. C. Bull, *et al.*, Plasmodium falciparum Variant Surface Antigen Expression Patterns  
960 during Malaria. *PLOS Pathog.* **1**, e26 (2005).
- 961 48. A. I. Abdi, *et al.*, Plasmodium falciparum malaria parasite var gene expression is modified  
962 by host antibodies: longitudinal evidence from controlled infections of Kenyan adults with  
963 varying natural exposure. *BMC Infect. Dis.* **2017 171 17**, 1–11 (2017).
- 964 49. H. M. Kyriacou, *et al.*, Differential var gene transcription in Plasmodium falciparum  
965 isolates from patients with cerebral malaria compared to hyperparasitaemia. *Mol.*  
966 *Biochem. Parasitol.* **150**, 211–218 (2006).
- 967 50. F. Duffy, *et al.*, Meta-analysis of plasmodium falciparum var signatures contributing to  
968 severe Malaria in African children and Indian adults. *MBio* **10** (2019).
- 969 51. S. Silva Pereira, J. Heap, A. R. Jones, A. P. Jackson, VAPPER: High-throughput variant  
970 antigen profiling in African trypanosomes of livestock. *Gigascience* **8** (2019).
- 971 52. S. S. Pereira, *et al.*, Variant antigen repertoires in *Trypanosoma congolense* populations  
972 and experimental infections can be profiled from deep sequence data using universal  
973 protein motifs. *Genome Res.* **28**, 1383 (2018).
- 974 53. S. Silva Pereira, *et al.*, Variant antigen diversity in *Trypanosoma vivax* is not driven by  
975 recombination. *Nat. Commun.* **11**, 844 (2020).
- 976 54. S. Silva Pereira, A. P. Jackson, L. M. Figueiredo, Evolution of the variant surface  
977 glycoprotein family in African trypanosomes. *Trends Parasitol.* (2021)  
978 <https://doi.org/10.1016/J.PT.2021.07.012> (August 12, 2021).
- 979 55. J. Pinger, *et al.*, African trypanosomes evade immune clearance by O-glycosylation of the  
980 VSG surface coat. *Nat. Microbiol.* **19**, 53 (2018).
- 981 56. F. Chappuis, L. Loutan, P. Simarro, V. Lejon, P. Büscher, Options for field diagnosis of  
982 human african trypanosomiasis. *Clin. Microbiol. Rev.* **18**, 133–146 (2005).
- 983 57. P. Truc, *et al.*, Evaluation of the micro-CATT, CATT/*Trypanosoma brucei gambiense*, and  
984 LATEX/T b gambiense methods for serodiagnosis and surveillance of human African  
985 trypanosomiasis in West and Central Africa. *Bull. World Health Organ.* **80**, 882–886  
986 (2002).
- 987 58. A. Beaver, *et al.*, Extravascular spaces are reservoirs of antigenic diversity in  
988 *Trypanosoma brucei* infection. *bioRxiv*, 2022.06.27.497797 (2022).
- 989 59. L. Glover, J. Jun, D. Horn, Microhomology-mediated deletion and gene conversion in  
990 African trypanosomes. *Nucleic Acids Res.* **39**, 1372–1380 (2011).
- 991 60. A. Thivolle, *et al.*, DNA double strand break position leads to distinct gene expression  
992 changes and regulates VSG switching pathway choice. *PLOS Pathog.* **17**, e1010038  
993 (2021).
- 994 61. G. Tonkin-Hill, *et al.*, Evolutionary analyses of the major variant surface antigen-encoding  
995 genes reveal population structure of Plasmodium falciparum within and between  
996 continents. *PLOS Genet.* **17**, e1009269 (2021).
- 997 62. H. Ilboudo, *et al.*, Introducing the TrypanoGEN biobank: A valuable resource for the

- 998 elimination of human African trypanosomiasis. *PLoS Negl. Trop. Dis.* **11**, e0005438  
999 (2017).
- 1000 63. M. Camara, *et al.*, Sleeping sickness diagnosis: use of buffy coats improves the  
1001 sensitivity of the mini anion exchange centrifugation test. *Trop. Med. Int. Heal.* **15**, 796–  
1002 799 (2010).
- 1003 64. P. P. Simarro, *et al.*, The Atlas of human African trypanosomiasis: A contribution to global  
1004 mapping of neglected tropical diseases. *Int. J. Health Geogr.* **9**, 57 (2010).
- 1005 65. P. González-Andrade, *et al.*, Diagnosis of trypanosomatid infections: Targeting the  
1006 spliced leader RNA. *J. Mol. Diagnostics* (2014)  
1007 <https://doi.org/10.1016/j.jmoldx.2014.02.006>.
- 1008 66. R. H. Brakenhoff, J. G. Schoenmakers, N. H. Lubsen, Chimeric cDNA clones: a novel  
1009 PCR artifact. *Nucleic Acids Res.* **19**, 1949 (1991).
- 1010 67. A. Meyerhans, J.-P. Vartanian, S. Wain-Hobson, DNA recombination during PCR.  
1011 *Nucleic Acids Res.* **18**, 1687–1691 (1990).
- 1012 68. M. G. Grabherr, *et al.*, Full-length transcriptome assembly from RNA-Seq data without a  
1013 reference genome. *Nat. Biotechnol.* **29**, 644–652 (2011).
- 1014 69. W. Li, A. Godzik, Cd-hit: a fast program for clustering and comparing large sets of protein  
1015 or nucleotide sequences. *Bioinformatics* **22**, 1658–1659 (2006).
- 1016 70. B. Langmead, C. Trapnell, M. Pop, S. L. Salzberg, Ultrafast and memory-efficient  
1017 alignment of short DNA sequences to the human genome. *Genome Biol.* **10**, R25 (2009).
- 1018 71. H. Storrval, D. Ramsköld, R. Sandberg, Efficient and comprehensive representation of  
1019 uniqueness for next-generation sequencing by minimum unique length analyses. *PLoS*  
1020 *One* **8**, e53822 (2013).
- 1021 72. J. R. Conway, A. Lex, N. Gehlenborg, UpSetR: An R Package for the Visualization of  
1022 Intersecting Sets and their Properties <https://doi.org/10.1101/120600> (December 16,  
1023 2021).
- 1024 73. B. Wickstead, K. Gull, Dyneins across eukaryotes: a comparative genomic analysis.  
1025 *Traffic* **8**, 1708–1721 (2007).
- 1026 74. K. Howe, A. Bateman, R. Durbin, QuickTree: Building huge neighbour-joining trees of  
1027 protein sequences. *Bioinformatics* **18**, 1546–1547 (2002).
- 1028 75. E. Paradis, K. Schliep, Ape 5.0: An environment for modern phylogenetics and  
1029 evolutionary analyses in R. *Bioinformatics* **35**, 526–528 (2019).
- 1030 76. F. Sievers, *et al.*, Fast, scalable generation of high-quality protein multiple sequence  
1031 alignments using Clustal Omega. *Mol. Syst. Biol.* **7**, 539–539 (2011).
- 1032 77. S. R. Eddy, Accelerated Profile HMM Searches. *PLoS Comput. Biol.* **7**, e1002195  
1033 (2011).
- 1034 78. G. Csárdi, T. Nepusz, The igraph software package for complex network research.  
1035 79. A. M. Bolger, M. Lohse, B. Usadel, Trimmomatic: a flexible trimmer for Illumina sequence  
1036 data. *Bioinformatics* **30**, 2114–2120 (2014).
- 1037 80. A. R. Quinlan, I. M. Hall, BEDTools: a flexible suite of utilities for comparing genomic  
1038 features. *Bioinformatics* **26**, 841–842 (2010).
- 1039 81. M. Lawrence, *et al.*, Software for Computing and Annotating Genomic Ranges. *PLOS*  
1040 *Comput. Biol.* **9**, e1003118 (2013).
- 1041 82. S. Mezulis, C. M. Yates, M. N. Wass, M. J. E Sternberg, L. A. Kelley, The Phyre2 web  
1042 portal for protein modeling, prediction and analysis (2015)  
1043 <https://doi.org/10.1038/nprot.2015.053> (July 19, 2022).
- 1044 83. E. F. Pettersen, *et al.*, UCSF ChimeraX: Structure visualization for researchers,  
1045 educators, and developers. *Protein Sci.* **30**, 70–82 (2021).
- 1046
